# Supplementary material for: Effect of an Artificial Intelligence–Based Self-Management App on Musculoskeletal Health in Patients With Neck and/or Low Back Pain Referred to Specialist Care: A Randomized Clinical Trial
Source: PubMed Central journal article supplement (PMC10300712; doi:10.1001/jamanetworkopen.2023.20400), 2023-06-27
Supplement: jamanetwopen-e2320400-s001.pdf [file jamanetwopen-e2320400-s001.pdf]

1 **Supplement 1. Trial protocol and Statistical Analysis Plan**

2 **The effectiveness of a self-management app and an e-Help webpage in people with low**  
3 **back and neck pain on a waiting list for outpatient rehabilitation: a protocol for a**  
4 **randomized controlled trial**

5

6 *Trial registration*

7 The trial will be registered in the database at [www.clinicaltrials.gov](http://www.clinicaltrials.gov).

8 *Protocol version: 1.0 (23/04/2020)*

9 *Funding*

10 Funding to undertake this trial has been obtained through a grant from the European Union Horizon  
11 2020 Research & Innovation Program (Grant no. 777090) as well as internal project funding.

12

13 This protocol was developed in accordance to the Standard Protocol Items: Recommendation for  
14 Intervention Trials (SPIRIT 2013) Statement [1] and the Consolidated Standards of Reporting Trials  
15 (CONSORT 2010) guidelines [2].

## 16 1. Introduction

17 Low back pain (LBP) and neck pain (NP) are highly prevalent musculoskeletal conditions [3, 4] and the  
18 leading cause of years lived with disability globally [5]. LBP and NP not only result in high personal  
19 suffering but also present as a major societal challenge due to high economic costs associated with  
20 reduced work productivity, sickness absence and greater health care resource utilization [6, 7]. As the  
21 global burden of LBP and NP is expected to increase in the coming years [8, 9], the identification of more  
22 effective and cost-effective strategies for the management of LBP and NP are the current priorities [10].

23 The use of eHealth and mHealth solutions for management of chronic pain can be a promising approach  
24 as they are easy to deliver, inexpensive and safe. In addition, mHealth solutions have the possibility to  
25 provide *tailored* support to individual patients which might be more beneficial compared to non-  
26 tailoring approaches [11, 12]. Although many smartphone apps for self-management of LBP are  
27 available, most of them are of poor quality and their effectiveness on pain and functional outcomes  
28 have not been documented [13, 14]. In an EU-funded project, we have developed an evidence-based  
29 decision support system (DSS) – SELFBACK app – designed to support and reinforce self-management of  
30 LBP [15]. The effectiveness of SELFBACK for supporting self-management of LBP among patients in  
31 primary care is currently under investigation. Here, we outline a protocol for testing a version of the  
32 SELFBACK app that is adopted to target both LBP and NP in a secondary care setting. The effectiveness  
33 of SELFBACK will be compared to a non-tailoring web-based solution – eHelp - providing evidence-based  
34 self-management content equivalent to the SELFBACK and to usual care only.

### 35 1.1 Objectives and hypothesis

36 The objective of the trial is to compare the effectiveness of the SELFBACK app in addition to usual care  
37 (intervention group 1) to the e-Help webpage in addition to usual care (intervention group 2) and to  
38 usual care only (control group) in terms of musculoskeletal health status measured by the  
39 Musculoskeletal Health Questionnaire (MSK-HQ) among patients with LBP and/or NP on a waiting list for  
40 outpatient rehabilitation.

41 The first hypothesis is that patients with LBP and/or NP randomized to receive the SELFBACK intervention  
42 would show greater improvements in health status at 3-month follow up compared to those  
43 randomized to usual care only. The second hypothesis is that the SELFBACK intervention would be  
44 superior to the e-Help webpage due to the additional tailoring of self-management program.  
45

## 46 2. Methods

47 This study will be conducted according to the principles of the Declaration of Helsinki (64th WMA  
48 General Assembly, Fortaleza, Brazil, October 2013). For the SELFBACK app intervention, we have notified  
49 the Norwegian Medicines Agency (SLV) and asked for approval of compliance with the relevant national  
50 regulations and EU Guidelines on Medical Software Devices.

### 51 2.1 Trial design

52 This is a single-blinded superiority randomized controlled trial (RCT) with three parallel groups.  
53 Participants with LBP and/or NP on a waiting list for a rehabilitation program will be randomized to  
54 receive: 1) the SELFBACK intervention in addition to usual care; 2) the e-Help webpage in addition to  
55 usual care; or 3) usual care only.

## 56 2.2 Study setting

57 Patients on waiting list for treatment at the multidisciplinary outpatient clinic for back, neck and  
58 shoulder rehabilitation, St. Olavs Hospital, Trondheim University Hospital, Norway, due to LBP and/or NP  
59 will be invited to this study.

## 60 2.3 Eligibility criteria

### 61 2.3.1 Inclusion criteria

- 62 • Adults  $\geq$  18 years
- 63 • On waiting list for treatment at the multidisciplinary outpatient clinic for back, neck and shoulder  
64 rehabilitation, St. Olavs Hospital, Trondheim University Hospital, Norway, due to LBP and/or NP
- 65 • Own and use a smartphone with internet access to download the mobile application
- 66 • Able to provide consent (i.e., not reduced ability to give consent)

### 67 2.3.2 Exclusion criteria

- 68 • Patients with less than 4 weeks waiting time until scheduled appointment at clinic (i.e., patients  
69 prioritized for urgent treatment/examination)
- 70 • Unable to take part in exercise/physical activity, e.g. non-ambulatory patients, use of walking aids,  
71 unable to get up and down the floor independently
- 72 • Unable to speak and/or read Norwegian

## 73 2.4 Recruitment of study participants

74 Recruitment will take place through the multidisciplinary outpatient clinic for back, neck, and shoulder  
75 rehabilitation at St. Olavs Hospital, Trondheim. The clinic receives approximately 4000-4500 referrals for  
76 LBP and/or NP each year (about 350 referrals/month) and the majority are received from general  
77 practitioners. Referrals from other primary and secondary care sources may also occur. Referred  
78 patients are registered into the system by a secretary and then assessed for suitability to undertake a  
79 rehabilitation program by a chief physician at the clinic. Around 49% of patients are admitted to the  
80 rehabilitation program based on referral and put on a waiting list. The remaining 51% are not admitted  
81 and either 1) referred to another specialist, e.g. orthopedic, surgeon, pain specialist (around 27%), or 2)  
82 referred to primary care provider (around 24%). Recruitment of participants for this trial is expected to  
83 start in May 2020 and end by December 2020.

## 84 2.5 Identification and screening of participants

85 Patients who are admitted to rehabilitation *and* currently on a waiting list will be the target group for  
86 this trial. Potential participants will be identified based on their allocation to the LBP and NP  
87 rehabilitation programs. To patients admitted to treatment, the clinic will send a letter within a week  
88 after the decision on admission. In parallel with sending the letter from the clinic, an SMS will be sent to  
89 potential participants with a link to a registration form. A phone number of a researcher will be provided  
90 in the SMS so that patients can call if they have any questions about the study before accessing the  
91 registration form. The registration form is accessed by participants through the eForsk platform via  
92 BankID and contains further information about the study with contact details of a researcher, self-  
93 assessment eligibility questions, the self-reported Fibromyalgia Survey Criteria and the StarT MSK  
94 stratification tool, and the participant information consent form. Participants who are not eligible to  
95 take part of the study will not be shown the informed consent process but will be asked if they consent

96 for the data collected to be used for quality assurance purposes at the clinic. If they do not consent, the  
97 data will be erased.

## 98 2.6 Informed consent process and enrolment of participants

99 If eligible and interested to participate, potential participants will be required to provide digital informed  
100 consent via the eForsk platform or written informed consent (see below). Potential participants can  
101 leave the registration form and return to it at a later stage should they need more time to consider their  
102 participation. At any time during this process, they will have the opportunity to contact a researcher  
103 who will answer any questions or concerns they might have about the study and their participation.

104 One reminder SMS will be sent to potential participants after a minimum of 3 days with the link to the  
105 registration form. If no response is registered after another additional 3 days, the potential participants  
106 will be contacted via phone by a secretary/research assistant at the clinic and asked whether they are  
107 interested in the study and/or assist participants if they encountered any technical issues with accessing  
108 the registration form. An option to perform the eligibility screening via phone will be provided for those  
109 who indicate this preference as well as the informed consent form, i.e. digital or hard copy formats will  
110 be sent to them accordingly to facilitate timely enrolment into the trial.

111 The following options will be available to participants should they choose the written consent form:

- 112 1) Send a photo of the signed consent form by SMS
- 113 2) Send a copy of the scanned signed consent by email
- 114 3) Send a hard copy of the signed consent form by mail

115 Once the consent process is completed, a link to the baseline questionnaire will be provided to  
116 participants by email. If the questionnaire is not filled out within 3 days, a reminder will be sent to them  
117 to avoid delays in the enrolment of the trial. If no response is registered after 5 days, the participant will  
118 be considered withdrawn from the study. A participant number will be assigned to those who complete  
119 the baseline questionnaire and subsequently the randomization will be performed online via a web-  
120 based randomization system.

## 121 2.7 Randomization

122 Participants are randomized to receive 1) SELFBACK intervention in addition to usual care; 2) e-Help  
123 webpage in addition to usual care; or 2) usual care only. Randomization is performed as block  
124 randomization with permuted blocks of random size (10 to 20 participants). Randomization will be  
125 performed by a web-based program (WebCRF) administered by the Unit of Applied Clinical Research,  
126 Faculty of Medicine and Health Sciences, Norwegian University of Science and Technology. This unit is  
127 not otherwise involved in the trial management or study conduct. The allocation ratio is balanced  
128 between the three groups, i.e., the SELFBACK intervention, e-Help webpage and the control group. The  
129 participants' flow is described in **Figure 1**.

## 130 2.8 Blinding

131 This study is a single-blinded trial. Participants and health personnel at the clinic will not be blinded to  
132 group allocation, whereas researchers performing the analysis and the interpretation of the results will  
133 be blinded to group allocation. Once the study is completed, the data will be extracted from the  
134 database in anonymized form for statistical analyses, i.e. all personal information that may identify  
135 specific participants or group allocation will be removed and the intervention and control groups will be

136 randomly labelled as A, B and C. The randomization key (document entailing information on which  
137 group is which) is kept at the Unit of Applied Clinical Research at NTNU. They will provide the  
138 randomization key to the research team once a blinded interpretation of the results is finalized.

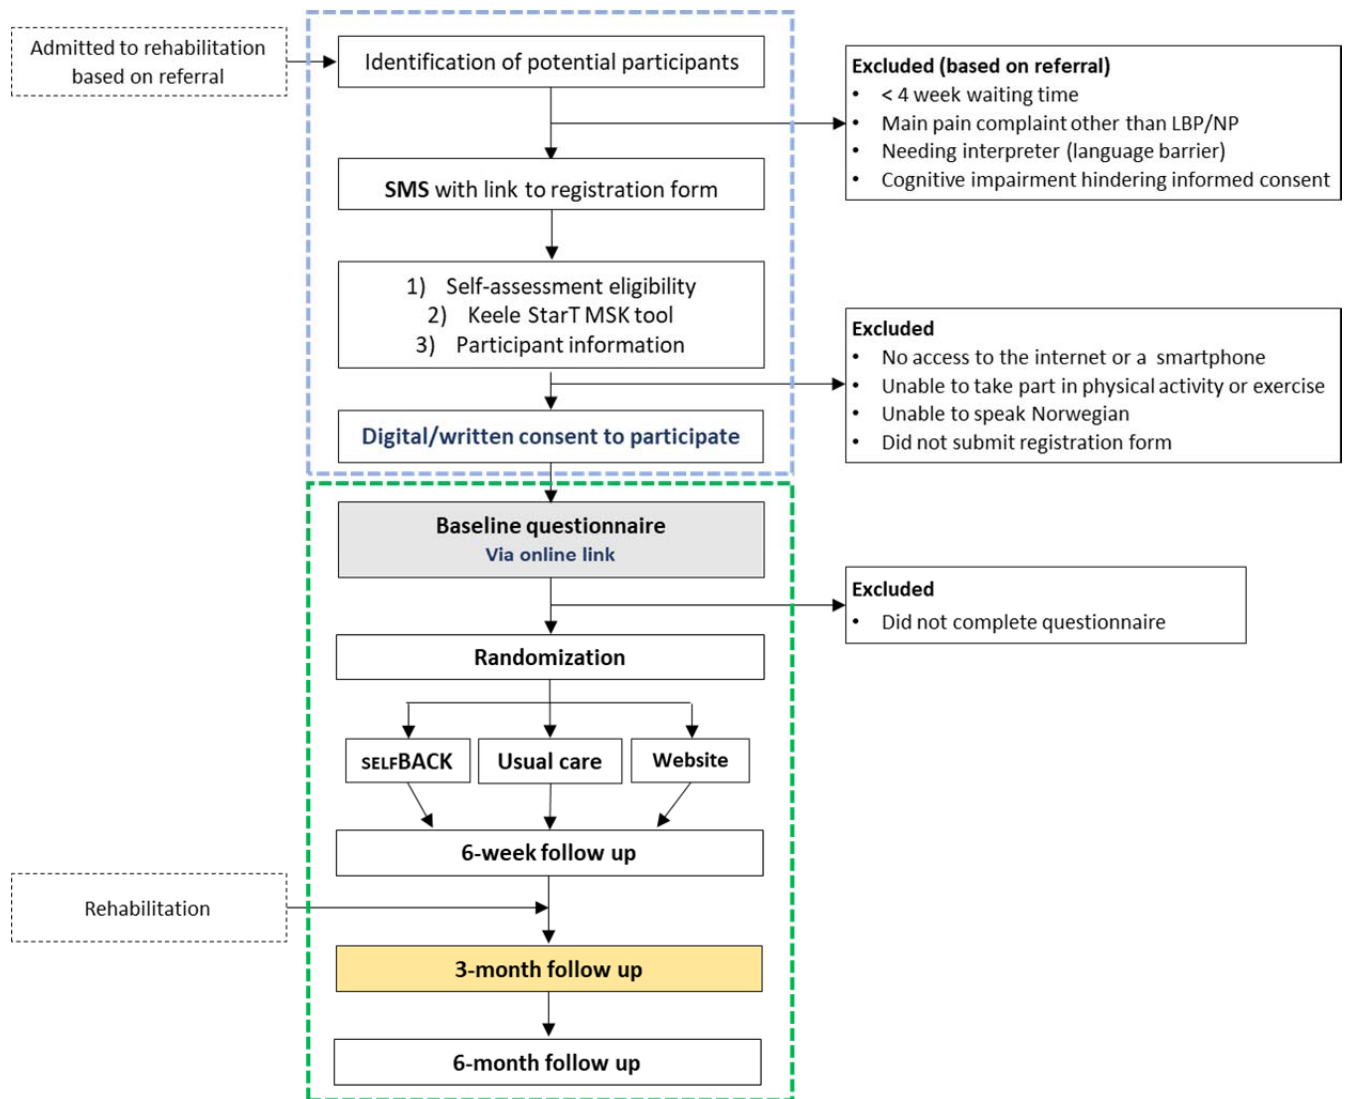

139  
140

141 **Figure 1** Study procedure and participant flow through the trial. Blue dotted box represents the actions  
142 taken by staff at the clinic; green dotted box represents the actions taken by researchers.

## 143 3. Interventions

### 144 3.1 Usual care (control group)

145 Participants randomized to usual care will follow any diagnostic or treatment-related pathways as  
146 chosen by the health care practitioner (HCP) they *may* consult. They will be allowed to seek care and  
147 receive treatments or help elsewhere as normal. Follow up assessments for the trial will be performed  
148 at pre-defined time points (see section 4).

### 149 3.2 SELFBACK app in addition to usual care (intervention group 1)

150 Patients randomized to the SELFBACK group will receive an SMS with link to the app that automatically  
151 install the app. The SELFBACK intervention is a DSS designed to support self-management of LBP and NP,  
152 delivered to participants in the form of the SELFBACK app. The SELFBACK app provides an individually  
153 tailored self-management plan to participants by matching the participant's health information with  
154 targeted educational messages, physical activity advices and exercise recommendations via the DSS. The  
155 intervention is not intended to replace follow-up by HCP, but to supplement the HCP's care and the  
156 participant is informed accordingly. Therefore, participants randomized to the SELFBACK intervention  
157 may continue to seek care, treatment or help elsewhere as normal.

158 The SELFBACK system constitutes a data-driven predictive DSS that uses the Case-Based Reasoning (CBR)  
159 methodology [16, 17] to capture and reuse participant cases in order to suggest the most suitable self-  
160 management plan for new participants. The data sources for the CBR system comprise: 1) the initial  
161 participant data collected by the baseline web-based questionnaire, and 2) a weekly report by the  
162 participant in the SELFBACK app (including pain, function, fear-avoidance, workability, sleep, self-  
163 efficacy, stress, health belief and barriers). On a *weekly* basis, this information is used to revise the self-  
164 management plan by matching the characteristics of the current participant case with existing successful  
165 participant cases in the SELFBACK case-base. The weekly tailoring questions will only be given if relevant  
166 for participants. Consequently, the DSS will deliver an individualized self-management plan for the  
167 coming week via the SELFBACK app. A full description of the DSS is published elsewhere [15].  
168 Importantly, all interaction between the participant and the SELFBACK DSS happens via the SELFBACK  
169 app. There is no interaction between the DSS and HCPs.

#### 170 3.2.1 The SELFBACK self-management content

171 The DSS builds the weekly self-management plan from three types of content:

##### 172 1) Physical activity level (i.e., number of steps) and goals

173 The SELFBACK app prompts participants to set a goal for physical activity by suggesting a gradual  
174 increase in daily steps if the past week's goal was achieved. A 10% increase is suggested, until a goal  
175 of 10.000 steps per day is reached. Participants may adjust the suggested goal, before accepting it.  
176 During the week, participants can see the achieved step-count per day and track their progress. The  
177 lowest step count goal that is possible to set will be 3000 steps per day and this was chosen to  
178 reflect the functional disability in the participant group in the trial which may also affect their  
179 physical activity level. Based on the achieved daily step count from previous week, the step count  
180 goal for the coming week is adjusted, and educational messages and notifications aimed to motivate  
181 more physical activity is pushed to the participant through the app.

## 182 2) Strength and flexibility exercises

183 The exercise material is compiled of exercises organized in different targets, e.g. back-, neck-,  
184 abdominal-, gluteal-, core muscle strength, pain relieve and flexibility. Participants are given an  
185 individualized exercise program with the default recommendation to perform exercises in 3-5  
186 sessions per week of 15 minutes (i.e. three exercises with an estimated duration of 5 min per  
187 exercise). The number of exercises is adjusted according to participants' availability and to the  
188 anticipated level of difficulty defined by baseline questionnaire. If participants present with an acute  
189 pain flare-up or high pain ratings, they will be only offered pain-relieving exercises until an  
190 acceptable pain level is achieved. The exercises are presented to participants as a short video  
191 accompanied by written instructions that include recommendations on number of sets and  
192 repetitions. Participants will be prompted in the app to report completed number of sets and  
193 repetitions per exercise. Once participants report the volume for an individual exercise, the DSS will  
194 offer a new exercise at a more difficult level in the coming week's self-management plan. Likewise,  
195 the system will recommend an exercise at an easier level if a low level of completion is registered. In  
196 addition, participants can request new exercises (at the same level of difficulty and within the same  
197 group of exercises) at the end of the self-management plan if they experience problems completing  
198 the suggested exercise.

## 199 3) Educational material

200 The educational material is compiled of 14 main components ("information about LBP/NP",  
201 "understanding mind-body", "self-management for LBP/NP", "thoughts, behavior, attitude and  
202 feeling", "fitting in self-management in a busy life", "first aid when your back hurts", "LBP/NP and  
203 comorbidities", "goal-setting and action planning", "pacing and graded activity", "problem solving",  
204 "relaxation", "sleep and LBP/NP", "social support" and "overcoming barriers for self-management of  
205 LBP/NP"). For each main component, a tree-structure of educational messages has been created.  
206 Every short message is about 140 characters long. Some messages may include links to longer, more  
207 explanatory text (max 500 characters) or tools that can be used to help with self-managing LBP/NP,  
208 e.g. goal setting tool, sleep advice, etc. Some short messages are also rewritten into "quizzes",  
209 where the educational content is rephrased into a yes or no type question. When answering a quiz,  
210 a follow-up answer is displayed to participants stating the correct answer with additional  
211 explanation.

### 212 3.2.2 *The SELFBACK mobile app*

213 The SELFBACK app has been developed as part of the SELFBACK project funded by the European Union  
214 Horizon 2020 research and innovation program. The SELFBACK app has been tested in a pilot study and  
215 is currently undergoing testing in a larger RCT in people with LBP in primary care. Participants access  
216 their weekly self-management plan via the SELFBACK app and enter data into the DSS by answering  
217 tailoring questions in the app. These data are combined with participants self-reported outcomes  
218 collected at baseline or latest follow-up questionnaire. Participants are required to use the SELFBACK  
219 app at least once a week to be offered a new self-management plan for the coming week. The app will  
220 send push-notifications reminding participants to open the app and view their new self-management  
221 plan. Participants can disable or adjust the frequency of notifications in the app settings. The goal of the  
222 intervention is that participants learn to self-manage their LBP and/or NP, which may potentially lead to  
223 participants discontinuing the use of the app. Therefore, discontinuation is not necessarily a sign of low



224 compliance but may indicate higher self-management levels. Nevertheless, to accommodate  
225 fluctuations in use of the app a “welcome back” sequence is constructed to guide participants back into  
226 the intervention if they re-open the app after more than 4 weeks.

### 227 3.3 e-Help webpage in addition to usual care (intervention group 2)

228 Participants randomized to receive the e-Help webpage will receive an email with a link to access the  
229 webpage. The e-Help is an evidence-based resource providing self-management content equivalent to  
230 the SELFBACK including educational messages, physical activity advises and exercise recommendations.  
231 The exercise material is presented in short videos along with instructions on how to build an exercise  
232 program and progression, however no tailoring of the content is offered in this solution. As such, no  
233 additional outcome data will be collected from participants randomized to receive the e-Help webpage  
234 beyond the regular follow up assessments. Participants will be advised to access the e-Help webpage  
235 regularly throughout the study period. Participants randomized to this group may continue to seek care,  
236 treatment or help elsewhere as normal.

### 237 3.4 Ancillary and post-trial care

238 Access to the SELFBACK app and the e-Help webpage will cease after the last follow-up by disabling the  
239 participants username in the system. No further post-trial care is planned.

240

## 241 4. Outcomes

242 All outcomes will be collected at baseline, and then six weeks, three months and six months after  
243 baseline. Demographic and health-related variables including age, sex, ethnicity, height, weight,  
244 educational status, employment, and relevant comorbidities will be collected at baseline. The timeline  
245 for data collection is reported in **Table 1** and described below.

246 Additionally, at the beginning of the study participants will be asked to fill out self-reported Fibromyalgia  
247 Survey Criteria [18] and the *Keele StarT MSK* tool which is a prognostic tool for patients with  
248 musculoskeletal pain developed to support clinical decisions by stratifying patients into three risk  
249 categories (high, medium and low) [19]. The Keele StarT MSK tool includes 10 items assessing  
250 psychosocial factors, function and disability, comorbidity and the impact of pain. The total score ranges  
251 from 0 to 12 where 0-4 score is classified as low risk, 5-8 as medium risk and 9-12 as high risk [19]. In  
252 addition, two items related to return to work will be administered to those in employment to predict  
253 short and long terms absence from work.

### 254 4.1 Primary outcome

255 The Musculoskeletal Health Questionnaire (MSK-HQ) measures the multidimensional *impact* of a  
256 musculoskeletal (MSK) condition on a person’s health and is chosen as primary outcome. The MSK-HQ is  
257 particularly suited for this study as it was designed to be applicable across various MSK conditions and  
258 clinical pathways, particularly primary and intermediate care settings [20]. The MSK-HQ contains 14  
259 items assessing key domains of MSK health status relevant to the patients including severity of  
260 pain/stiffness, physical function, physical activity level, symptom interference, sleep, fatigue, emotional  
261 well-being, understanding diagnosis and treatment, confidence to self-manage, independence and  
262 overall impact of symptoms. Each item is scored from 0 to 4 and scores from all items are summed to  
263 provide a final score ranging from 0 to 56, with higher scores indicating better MSK health status.

264 The questionnaire has shown excellent test-retest reliability, high internal consistency [20] and  
265 adequate responsiveness to change in four validation cohorts [21]. The minimal clinical important  
266 difference for the MSK-HQ has been reported to be 5.5 points (95% CI 2.7 to 8.3) [21]. The questionnaire  
267 is translated and available in Norwegian language.

#### 268 4.2 Secondary outcome

269 *Pain-related disability* will be measured by the Roland Morris Disability questionnaire (RMDQ) [22] and  
270 by the Neck Disability Index (NDI) [23]. The RMDQ consists of 24 items asking participants to indicate if  
271 they experience functional impairments by answering 'yes' or 'no' to a series of descriptions of  
272 functional abilities. The NDI consists of 10 items asking participants to rate their functional abilities  
273 related to neck pain. Each item is rated on a scale from 0 to 5 and the final score is 50 with higher score  
274 indicating higher pain-related disability.

275 The *average and worst LBP/NP intensity* within the past week will be assessed using a 11-point  
276 numerical rating scale (NRS) ranging from 0='no pain' to 10='worst pain imaginable'.

277 The *Pain duration* will be measured by asking the following two questions: 1) "What is the length of time  
278 you have had LBP/NP during this episode?", and 2) "What is the total length of time that you have had  
279 LBP/NP during the last 12 months?".

280 *Pain medication* frequency intake will be measured by asking "How many days during the last week have  
281 you taken non-prescription pain medication for LBP/NP?".

282 The *Fear-Avoidance Belief Questionnaire (FABQ)* assesses participant's beliefs about how physical  
283 activity and work affect their LBP and/or NP [24]. The FABQ is a 5-item questionnaire, where  
284 participants score their beliefs about their LBP/NP on an ordinal scale ranging from 0='completely  
285 disagree' to 6='completely agree'. This scale was slightly modified by changing the word 'back' to 'back  
286 or neck' as reported in other studies [25, 26].

287 The *Pain Self-Efficacy Questionnaire (PSEQ)* assesses participants' level of confidence in carrying out  
288 specific activities despite their pain [27]. The PSEQ is a 10-item questionnaire scored on an ordinal scale  
289 ranging from 0 = 'completely disagree' to 6='completely agree'.

290 *Activity Limitation* questionnaire evaluates whether LBP/NP has been limiting for work and leisure  
291 activities. This consists of two single items with response options 'yes' and 'no'.

292 *Work Ability* is measured by the single-item work ability index (WAI) question and rated on an 11-point  
293 NRS scale ranging from 0='completely unable to work' to 10='work ability at its best' [28].

294 The revised version of *Saltin-Grimby Physical Activity Level Scale* will be used to evaluate self-reported  
295 physical activity. Participants are asked to indicate the amount of time per week performing leisure  
296 activities with four levels of intensity ranging from sedentary to vigorous physical activity [29].

297 The *Patient Specific Functional Scale (PSFS)* will be used to evaluate function. Participants are asked to  
298 rate their ability to perform up to two self-selected activities regarded as important by them [30]. The  
299 ability to carry out the activities is rated from 0='unable to perform' to 10='completely able to perform'.

300 *Sleep problems* will be assessed by four self-report items about problems with falling asleep, waking up  
301 repeatedly, waking up too early, and feeling sleepy during the day [31]. Items are scored as 'seldom or

302 never', 'sometimes', and 'several times a week'. Responses to these four items will provide information  
 303 needed to diagnose insomnia according to the DSM-V criteria [32].

304 The *Perceived Stress Scale (PSS)* will be used to evaluate stress levels [33]. This consists of 10 items  
 305 asking about frequency of thoughts and feelings related to perceived stress rated on a 5-point Likert  
 306 scale ranging from 0='never' to 4='very often'.

307 The *EuroQoL 5-dimension (EQ-5D)* questionnaire will be used to assess health-related quality of life [34].  
 308 This consists of 5 dimensions, i.e. mobility, self-care, activities, pain/discomfort and anxiety/depression  
 309 rated on a 5-point Likert scale ranging from 'no problem' to 'complete inability'.

310 The *Brief Illness Perception Questionnaire (BIPQ)* will be used to evaluate participants' illness perception  
 311 [35]. This consists of 8 items that are scored on an ordinal scale ranging from 0='no problem' to  
 312 10='worst severity'.

313 The *Patient Health Questionnaire-8 (PHQ-8)* will be used to evaluate patients' depressive symptoms  
 314 [36]. This consists of 8 items scored on a 4-point Likert scale ranging from 0='not at all' to 4='nearly  
 315 every day' assessing the frequency of experiencing symptoms of depression.

316 *Patient Acceptable Symptom State (PASS)* will be used to determine which patients consider themselves  
 317 well and, as such, are satisfied with the treatment [37].

318 *Patient's Global Perceived Effect* will be used as a single item question to investigate participants'  
 319 perception of effect from the intervention they have received [38].

### 320 4.3 Other outcomes

321 Participants randomized to the SELFBACK intervention will be asked a set of weekly tailoring questions  
 322 to individualize the self-management plans. Participants will be asked a maximum of 7 questions per  
 323 week (usually 3-4). These include pain intensity (11-point NRS), function (item 5 from the Chronic Pain  
 324 Grade Questionnaire [39]), fear-avoidance (item 1 Tampa scale [40]), workability (single-item WAI [28]),  
 325 sleep (single-item PSS [31]), symptoms of depression (2 items from PHQ-8 [36]), and barriers of self-  
 326 management (single-item, customized to SELFBACK). The selection of questions is based on a set of rules  
 327 implemented in the backend of the DSS which takes into account the progression of the self-  
 328 management and the participant's characteristics.

329 **Table 1** Data collection timeline

| Baseline                    | Follow-ups                            | Weekly (SELFBACK)   |
|-----------------------------|---------------------------------------|---------------------|
| Demographic variables       | <b>MKS-HQ*</b>                        | Pain intensity      |
| <b>MKS-HQ*</b>              | Disability level                      | Function            |
| Disability level            | Pain intensity and duration           | Fear avoidance      |
| Pain intensity and duration | Pain medications                      | Work ability        |
| Pain medications            | Pain-related cognitions               | Sleep               |
| Pain-related cognitions     | Physical activity level               | Depressive symptoms |
| Physical activity level     | Function                              | Barriers to SM      |
| Function                    | Activity limitation                   |                     |
| Activity limitation         | Work ability                          |                     |
| Work ability                | Sleep                                 |                     |
| Sleep                       | Mood (stress and depressive symptoms) |                     |

|                                       |                                   |  |
|---------------------------------------|-----------------------------------|--|
| Mood (stress and depressive symptoms) | Health-related quality of life    |  |
| Health-related quality of life        | Illness perception                |  |
| Illness perception                    | Patients acceptable symptom state |  |
|                                       | Patient's global perceived effect |  |

330 \* Primary outcome. MSK-HQ: Musculoskeletal Health Questionnaire; SM: self-management  
331

## 332 5. Statistics

### 333 5.1 Sample size estimation

334 This RCT is a superiority study with three parallel groups. Participants with LBP and/or NP on a waiting  
335 list for rehabilitation will be randomized to receive: 1) the SELFBACK intervention in addition to usual  
336 care (intervention group 1); 2) the e-Help webpage in addition to usual care (intervention group 2); or 3)  
337 usual care only (control group). We will test the hypothesis that the SELFBACK group will have a 4-point  
338 improvement in musculoskeletal health, assessed by MSK-HQ, compared to the e-Help webpage group  
339 and the usual care group over the 3 months follow-up period. The minimally important change for MSK-  
340 HQ is 5.5 (95% CI 2.7-8.3). This calculation was based on data from 610 individuals with musculoskeletal  
341 conditions recruited from four various clinical pathways; patients treated with physiotherapy for a range  
342 of musculoskeletal conditions in primary care and patients undergoing hip replacement, knee  
343 replacement or shoulder surgery in secondary care ([https://innovation.ox.ac.uk/outcome-  
344 measures/musculoskeletal-health-questionnaire-msk-hq/](https://innovation.ox.ac.uk/outcome-measures/musculoskeletal-health-questionnaire-msk-hq/)).  
345

346 The sample size calculations have been performed in two ways. First, we conducted a simple calculation  
347 assuming only one follow-up measure and a standard deviation (SD) of the MSK-HQ score of 10 points.  
348 Based on this calculation we estimated that a sample size of 396 (132 per arm) was necessary to detect  
349 a 4-point difference with 90% power and a two-sided alpha level of 0.05. We then performed a  
350 simulation using 2000 repetitions of a mixed model regression for repeated measures, assuming 1) three  
351 data points per participant (i.e., baseline, 6 weeks, and 3 months), 2) an effect of treatment of 4 points  
352 on the MSK-HQ, 3) an SD of 10 points, 4) a correlation between repeated measures of 0.4, and a two-  
353 sided alpha level of 0.05. Based on these assumptions, sample size calculations showed that 360  
354 participants (i.e., 120 participants in each group) gave a power of 91% (95% confidence interval [CI 90-  
355 92]) to detect a 4-point difference in MSK-HQ score between study groups at 3 months. A recent  
356 systematic review showed that attritions rates ranged between 4-94% for digital self-management  
357 interventions lasting between two weeks and 12 months in LBP populations [14]. To allow for a 20%  
358 drop out rate at 3 months follow-up we aim at including a total of 432 participants in the trial; 144  
359 participants in each arm.  
360

## 361 6. Data collection and management

### 362 6.1 Data collection

363 Data will be collected online directly from participants. Participants will be sent an email with a link that  
364 directs them to the web-based baseline questionnaire using their username and password provided at  
365 the start of the trial. To ensure a high response rate at follow-ups, one reminder e-mail will be sent after  
366 one week and an additional e-mail after two weeks. However, for the 6-week assessment a reminder  
367 email will be sent after 2 days to ensure timely collection of data before the start of the rehabilitation  
368 program. For the primary outcome at three months, a researcher will call the participant if there is no  
369 response after 4 days after sending the reminder email. The researcher will then ask if the patient is

370 willing to answer the primary outcome, i.e. MSK-HQ on the phone. Three attempts will be made at  
371 different days of the week and times of day.

372 In addition to the outcomes obtained at baseline and follow-ups, participants in the intervention group  
373 1 will answer a set of tailoring questions on a weekly basis as described in section 4.3. These will be  
374 collected online as described above.

## 375 6.2 Data management

### 376 6.2.1 Handling personally identifiable data

377 Upon enrolment into the trial, participants will be assigned an identification number for the study. A key  
378 document, linking the identification number to participants' name, email address, and phone number  
379 will be created and kept securely at the research facility. The data collection process will be automated  
380 in order to minimise the potential for error in the data collection. Email addresses for included  
381 participants will be securely stored at the research facility, enabling the system to automatically send  
382 emails to the participants with links to the questionnaire website. At the website, participants log in and  
383 access the questionnaires at baseline and follow-ups. To safeguard the email addresses, the link  
384 between participant identification number and email address is kept in a database separate from the  
385 database where outcome data are stored. Consequently, only the id number is registered in the system,  
386 whereby all personally identifiable data are kept separate from the DSS and apps.

### 387 6.2.2 Data security

388 All outcome data is stored at a secure server at Department of Computer Science, NTNU, Norway. The  
389 servers are firewall protected. The entire virtual machine is backed-up daily, and back-ups are kept for a  
390 one-year period. Data storage is compliant with existing European law.

391 The SELFBACK servers can only be accessed by the technical staff at NTNU's Department of Computer  
392 Science (Kerstin Back, Ilya Ashikhmin). Additional access can only be approved by the responsible  
393 technical staff (Kerstin Bach). Researchers connected to the recruitment of participants, data collection  
394 and conduct of the trial are not allowed to add data or to review, access, or make changes in original  
395 participant data. Also, any events in the servers are logged in a log-file to be able to review events or  
396 changes to the database. Finally, no information concerning group allocation is held in the outcome  
397 database, this information is kept in the WebCRF system (as described in section 2.7), which is separate  
398 from the entire SELFBACK system.

## 400 7. Data monitoring

### 401 7.1 Harms

402 No serious adverse events are expected for this trial. Regarding the SELFBACK intervention, as the self-  
403 management plans may include advice to increase physical activity and exercise volume, increased  
404 muscle soreness and transient increase in joint pain are expected. Such symptoms are well known in  
405 exercise interventions and as they are transient, they pose no harm to the participants [41].  
406 Additionally, participants are informed that such events may occur and that they are normal. Further,  
407 any detection of unusual pain increase is automatically reacted to by the DSS system and a suggestion to  
408 adjust volume of physical activity or exercise and advice on handling muscle pain is given to the

409 participant. In addition, a checklist can be consulted within the app if participants are experiencing  
410 worsening of symptoms or pain flare-ups. In the checklist, participants are advised to seek care with  
411 their primary care provider or emergency clinics as they normally would. Consequently, as serious  
412 adverse events are unexpected no interim analysis or a priori defined stopping rules are defined or  
413 implemented for this trial. However, in the unlikely event of an adverse event this will be fully recorded  
414 and reported to Norwegian health authorities in line with EU Guidelines on Medical Devices (MEDDEV  
415 2.7/3), Clinical Investigations: Serious adverse event reporting under directives 90/385/eec and  
416 93/42/eec<sup>1</sup>.

417 A telephone hotline will be established where participants can seek technical support for any questions  
418 relative to the use of the app during office hours or by leaving a message asking to be contacted the  
419 following day. Although the SELFBACK app and the e-Help webpage are designed to be self-explanatory,  
420 adequate training on how to use the app and the webpage will be provided via instruction videos and  
421 through the possibility to call the hotline. Also, the SELFBACK app will link to a website with a Frequently  
422 Asked Questions section that can guide participants with technical issues. Should a participant call the  
423 telephone hotline concerning any worsening of symptoms, the participant will be advised to seek care  
424 from their health care professional as they normally would if not included in the trial. All enquiries to the  
425 telephone hotline will be recorded and discussed in an internal audit and reported with the study  
426 results.

427 We do not foresee any adverse events related to the use of the e-Help webpage. Nevertheless, the  
428 telephone hotline described above will also be available for users of the e-Help webpage concerning  
429 technical issues.

## 430 7.2 Auditing

431 On a monthly basis, the project leader (Sigmund Gismervik), a secretary at the clinic involved in patient  
432 recruitment, the chief physician assessing patient referrals, and a member of the research team will  
433 review the recruitment, enrolment, data collection, conduct of the intervention, completion of the trial,  
434 reported adverse events and discuss appropriate actions to any inconsistencies or unexpected events.  
435 The purpose of this internal audit is to detect any inconsistency between the planned trial conduct and  
436 the performed trial conduct as well as suggesting measures to address such inconsistencies. In the  
437 unlikely case of serious events that may be related to the conduct of the trial, the principal investigator  
438 will be responsible on decisions about premature suspension.

## 440 8. Ethics and dissemination

### 441 8.1 Research ethics approval

442 Authorization from the Regional Committee for Medical and Health Research Ethics is to be sought  
443 before the commencement of any research-related activity. Approval from institutional review board  
444 and/or data protection will be obtained by the National Data Protection Authority and/or the Centre for  
445 Research Data.

447

---

448 <sup>1</sup> <http://ec.europa.eu/DocsRoom/documents/16477/attachments/1/translations/en/renditions/pdf>

449 **8.2 Protocol amendments**

450 Any amendments to the protocol will be registered with a detailed description of the change and date of  
451 implementation. Any amendments to the protocol will be filed with the relevant ethical committees or  
452 data protection agencies and registered in the clinical trial registry ([www.clinicaltrials.gov](http://www.clinicaltrials.gov)) for  
453 transparency. Any amendments to the protocol related to the SELFBACK app will be submitted to the  
454 Norwegian Medicines Agency for approval.

455 **8.3 Declaration of interests**

456 The aim of this project is to test the effectiveness of the SELFBACK app and the e-Help website in  
457 improving musculoskeletal health among patients on waiting list for multidisciplinary treatment for LBP  
458 and/or NP at an outpatient clinic. The results and experiences from the RCT may inform the further  
459 development of the app. The SELFBACK app may be introduced into a commercial market. In order to  
460 secure an unbiased interpretation and dissemination of the RCT, the interpretation of the results will  
461 therefore be performed blind to group allocation. Upon publication of study results, this commercial  
462 potential of the SELFBACK app will be clearly stated and the publication will undergo peer-review to  
463 ensure methodological and scientific rigor.

464 **8.4 Access to data**

465 NTNU will have sole ownership of the data collected. All personal identifiable data collected in the trial  
466 will be kept for five years. Hereafter the data set will be fully anonymised. These data are kept to enable  
467 tracking of any adverse events reported post completion of the trial, and to enable the project to  
468 contact enrolled participants should any plan of additional long-term follow-ups be necessary. The  
469 anonymised full data set will be kept for 30 years for research purposes.

470 **8.5 Dissemination policy**

471 The results of this RCT will be disseminated through publications in peer-reviewed journals as well as  
472 through reports and presentations at national and international conferences relevant to this research  
473 topic.



474

## References

- 475 1. Chan, A.-W., et al., *SPIRIT 2013 statement: defining standard protocol items for clinical trials*.  
476 *Annals of internal medicine*, 2013. 158(3): p. 200-207.
- 477 2. Schulz, K.F., D.G. Altman, and D. Moher, *CONSORT 2010 statement: updated guidelines for*  
478 *reporting parallel group randomised trials*. *BMC medicine*, 2010. 8(1): p. 18.
- 479 3. Hagen, K., et al., *Increasing Prevalence of Chronic Musculoskeletal Complaints. A Large 11-Year*  
480 *Follow-Up in the General Population (HUNT 2 and 3)*. *Pain Medicine*, 2011. 12(11): p. 1657-1666.
- 481 4. Picavet, H. and J. Schouten, *Musculoskeletal pain in the Netherlands: prevalences, consequences*  
482 *and risk groups, the DMC3-study*. *Pain*, 2003. 102(1-2): p. 167-178.
- 483 5. Vos, T., et al., *Global, regional, and national incidence, prevalence, and years lived with disability*  
484 *for 310 diseases and injuries, 1990–2015: a systematic analysis for the Global Burden of Disease*  
485 *Study 2015*. *The Lancet*, 2016. 388(10053): p. 1545-1602.
- 486 6. Gore, M., et al., *The burden of chronic low back pain: clinical comorbidities, treatment patterns,*  
487 *and health care costs in usual care settings*. *Spine*, 2012. 37(11): p. E668-E677.
- 488 7. Manchikanti, L., et al., *Comprehensive review of epidemiology, scope, and impact of spinal pain*.  
489 *Pain physician*, 2009. 12(4): p. E35-70.
- 490 8. Hoy, D., et al., *The global burden of neck pain: estimates from the global burden of disease 2010*  
491 *study*. *Annals of the rheumatic diseases*, 2014. 73(7): p. 1309-1315.
- 492 9. Hartvigsen, J., et al., *What low back pain is and why we need to pay attention*. *The Lancet*, 2018.  
493 391(10137): p. 2356-2367.
- 494 10. Buchbinder, R., et al., *Low back pain: a call for action*. *The Lancet*, 2018. 391(10137): p. 2384-  
495 2388.
- 496 11. Hayden, J.A., M.W. Van Tulder, and G. Tomlinson, *Systematic review: strategies for using exercise*  
497 *therapy to improve outcomes in chronic low back pain*. *Annals of internal medicine*, 2005. 142(9):  
498 p. 776-785.
- 499 12. O'Connor, S., et al., *Understanding factors affecting patient and public engagement and*  
500 *recruitment to digital health interventions: a systematic review of qualitative studies*. *BMC*  
501 *medical informatics and decision making*, 2016. 16(1): p. 120.
- 502 13. Machado, G.C., et al., *Smartphone apps for the self-management of low back pain: A systematic*  
503 *review*. *Best Practice & Research Clinical Rheumatology*, 2016. 30(6): p. 1098-1109.
- 504 14. Nicholl, B.I., et al., *Digital Support Interventions for the Self-Management of Low Back Pain: A*  
505 *Systematic Review*. *J Med Internet Res*, 2017. 19(5): p. e179.
- 506 15. Mork, P.J. and K. Bach, *A decision support system to enhance self-Management of low Back Pain:*  
507 *protocol for the selfBACK project*. *JMIR research protocols*, 2018. 7(7): p. e167.
- 508 16. Aamodt, A. and E. Plaza, *Case-based reasoning: Foundational issues, methodological variations,*  
509 *and system approaches*. *AI communications*, 1994. 7(1): p. 39-59.
- 510 17. Montani, S. and L.C. Jain, *Successful case-based reasoning applications*. Vol. 305. 2010: Springer.
- 511 18. Wolfe, F., et al. *2016 Revisions to the 2010/2011 fibromyalgia diagnostic criteria*. in *Seminars in*  
512 *arthritis and rheumatism*. 2016. Elsevier.
- 513 19. Campbell, P., et al., *Keele Aches and Pains Study protocol: validity, acceptability, and feasibility of*  
514 *the Keele STarT MSK tool for subgrouping musculoskeletal patients in primary care*. *Journal of*  
515 *pain research*, 2016. 9: p. 807.
- 516 20. Hill, J.C., et al., *Development and initial cohort validation of the Arthritis Research UK*  
517 *Musculoskeletal Health Questionnaire (MSK-HQ) for use across musculoskeletal care pathways*.  
518 *BMJ open*, 2016. 6(8): p. e012331.



- 519 21. Price, A.J., et al., *Determining responsiveness and meaningful changes for the Musculoskeletal*  
520 *Health Questionnaire (MSK-HQ) for use across musculoskeletal care pathways.* *BMJ open*, 2019.  
521 9(10): p. e025357.
- 522 22. Roland, M. and R. Morris, *A Study of the Natural History of Back Pain: Part I Development of a*  
523 *Reliable and Sensitive Measure of Disability in Low-Back Pain.* *spine*, 1983. 8(2): p. 141-144.
- 524 23. Vernon, H. and S. Mior, *The Neck Disability Index: a study of reliability and validity.* *Journal of*  
525 *manipulative and physiological therapeutics*, 1991.
- 526 24. Waddell, G., et al., *A Fear-Avoidance Beliefs Questionnaire (FABQ) and the role of fear-avoidance*  
527 *beliefs in chronic low back pain and disability.* *Pain*, 1993. 52(2): p. 157-168.
- 528 25. Landers, M.R., et al., *The use of fear-avoidance beliefs and nonorganic signs in predicting*  
529 *prolonged disability in patients with neck pain.* *Manual therapy*, 2008. 13(3): p. 239-248.
- 530 26. Cleland, J.A., J.M. Fritz, and J.D. Childs, *Psychometric Properties of the Fear-Avoidance Beliefs*  
531 *Questionnaire and Tampa Scale of Kinesiophobia in Patients with Neck Pain.* *American Journal of*  
532 *Physical Medicine & Rehabilitation*, 2008. 87(2): p. 109-117.
- 533 27. Nicholas, M., *Pain self efficacy questionnaire (PSEQ).* Summary of psychometric properties from  
534 original Westmead hospital sample (1986e87). Sydney: University of Sydney Pain Management  
535 and Research Centre, 1994.
- 536 28. Ahlstrom, L., et al., *The work ability index and single-item question: associations with sick leave,*  
537 *symptoms, and health—a prospective study of women on long-term sick leave.* *Scandinavian*  
538 *journal of work, environment & health*, 2010: p. 404-412.
- 539 29. Grimby, G., et al., *The “Saltin–Grimby Physical Activity Level Scale” and its application to health*  
540 *research.* *Scandinavian journal of medicine & science in sports*, 2015. 25: p. 119-125.
- 541 30. Hefford, C., et al., *The patient-specific functional scale: validity, reliability, and responsiveness in*  
542 *patients with upper extremity musculoskeletal problems.* *journal of orthopaedic & sports physical*  
543 *therapy*, 2012. 42(2): p. 56-65.
- 544 31. Engstrøm, M., et al., *The reliability of a new sleep screening questionnaire for large population-*  
545 *based studies: the third nord-trøndelag health study.* *The Open Sleep Journal*, 2011. 4(1).
- 546 32. Association, A.P., *Diagnostic and statistical manual of mental disorders (DSM-5®).* 2013: American  
547 Psychiatric Pub.
- 548 33. Cohen, S., T. Kamarck, and R. Mermelstein, *A global measure of perceived stress.* *Journal of health*  
549 *and social behavior*, 1983: p. 385-396.
- 550 34. Brooks, R. and E. Group, *EuroQol: the current state of play.* *Health policy*, 1996. 37(1): p. 53-72.
- 551 35. Hallegraeff, J.M., et al., *Measurement of acute nonspecific low back pain perception in primary*  
552 *care physical therapy: reliability and validity of the brief illness perception questionnaire.* *BMC*  
553 *musculoskeletal disorders*, 2013. 14(1): p. 53.
- 554 36. Kroenke, K., et al., *The PHQ-8 as a measure of current depression in the general population.*  
555 *Journal of affective disorders*, 2009. 114(1-3): p. 163-173.
- 556 37. Kvien, T.K., T. Heiberg, and K.B. Hagen, *Minimal clinically important improvement/difference*  
557 *(MCI/MCID) and patient acceptable symptom state (PASS): what do these concepts mean?* *Annals*  
558 *of the rheumatic diseases*, 2007. 66(suppl 3): p. iii40-iii41.
- 559 38. Kamper, S.J., et al., *Global Perceived Effect scales provided reliable assessments of health*  
560 *transition in people with musculoskeletal disorders, but ratings are strongly influenced by current*  
561 *status.* *Journal of clinical epidemiology*, 2010. 63(7): p. 760-766. e1.
- 562 39. Von Korff, M., et al., *Grading the severity of chronic pain.* *Pain*, 1992. 50(2): p. 133-149.
- 563 40. Verwoerd, A.J., et al., *A single question was as predictive of outcome as the Tampa Scale for*  
564 *Kinesiophobia in people with sciatica: an observational study.* *Journal of physiotherapy*, 2012.  
565 58(4): p. 249-254.

- 566 41. Olsen, O., et al., *The effect of warm-up and cool-down exercise on delayed onset muscle soreness*  
567 *in the quadriceps muscle: a randomized controlled trial.* Journal of human kinetics, 2012. 35(1): p.  
568 59-68.

569 **An individually tailored self-management app-based intervention**  
570 **(SELFBACK) versus a self-management web-based intervention (e-Help) or**  
571 **usual care in people with low back and neck pain referred to secondary**  
572 **care: protocol for a multi-arm randomised clinical trial**

573 **Section 1: Administrative Information**

574

575 SAP Version 1.0 (03.08.2021)

576 DOI: 10.5281/zenodo.5155811

577

578 This SAP is based on the protocol registered in ClinicalTrials.gov (NCT04463043) and the  
579 submitted protocol paper. The structure and content of the SAP is adopted from the  
580 Guidelines for the Content of Statistical Analyses Plans in Clinical Trials <sup>1</sup>.

581

582 Table 1. SAP revision history

| Revision | Justification for revision | Version (date) |
|----------|----------------------------|----------------|
|          |                            |                |
|          |                            |                |

583

584

585 Signatures

586

587



588 Senior Statistician

589

590



591 Project Coordinator

592 **Section 2: Introduction**

593

594 **2.1 Background and rationale**

595

596 Self-management is a key element in the care of low back pain (LBP) and neck pain (NP).  
597 Current best evidence recommends that self-management is tailored to individual needs and  
598 capabilities and includes elements such as education, exercise programs, and advice to stay  
599 active<sup>2</sup>. In primary care, general practitioners commonly lack time, resources and training for  
600 delivering evidence-based self-management support<sup>3</sup>, while access to specialist care for  
601 patients with more complex symptoms is generally limited and requires long waiting time.  
602 Digital solutions, such as mobile applications (apps) provide a viable option for supporting  
603 tailored self-management across care pathways as they can be accessible to patients at any  
604 time and at low cost. The role of digital interventions as an adjunct to secondary care have  
605 not yet been explored. Further, the added benefit of a tailored over a non-tailored approach is  
606 currently unclear.

607 We have developed an evidence-based and data-driven decision support system (DSS)  
608 delivered via a smartphone app – SELFBACK – to facilitate, improve and reinforce  
609 individually tailored self-management of non-specific LBP, which has been adapted to also  
610 target NP<sup>4</sup>. Additionally, we have developed a website – eHelp – that mimics the content of  
611 the SELFBACK app, but without individual tailoring. The effectiveness of these digital  
612 interventions is evaluated in a secondary care setting in a multi-arm randomised clinical trial  
613 (RCT).

614

615 **2.2 Objectives**

616

617 The primary objective is to evaluate the effectiveness of the SELFBACK DSS as adjunct to  
618 usual care versus usual care only. The secondary objective is to compare the effectiveness of  
619 the SELFBACK DSS to the e-Help website as well as e-Help vs usual care. The primary  
620 outcome is musculoskeletal health at three months measured by the Musculoskeletal Pain  
621 Questionnaire (MSK-HQ).

622 The effect of the interventions on secondary outcomes, including quality of life, use of  
623 non-prescriptive medication, sleep problems, depressive symptoms, stress, functional ability,  
624 and pain intensity, will be assessed at three months. We will also evaluate the effect on these  
625 measures, as well as on MSK-HQ, at six months.

626

627 **Section 3: Study Methods**

628

629 **3.1 Trial design**

630

631 This study is designed as a multi-arm RCT where patients with LBP and/or NP are  
632 randomised to three parallel groups (allocation ratio 1:1:1). The intervention groups will be  
633 given access to the SELFBACK DSS delivered via a smartphone app, or to the e-Help website,  
634 additional to usual care, whereas the control group will get usual care only. The target  
635 population is people referred to secondary care for LBP and/or NP at the multidisciplinary  
636 clinic for back-, neck-, and shoulder rehabilitation at St. Olavs Hospital, Trondheim, Norway;  
637 see also sections 5.2 and 5.3.

638

639 **3.2 Randomization**

640 Randomisation is performed as a permuted block randomisation of random size unknown to  
641 the research team to ensure allocation concealment. Randomisation is performed by a web-  
642 based randomisation system (Web Case Report Form; WebCRF) developed and administered  
643 by Unit of Applied Clinical Research, Faculty of Medicine and Health Sciences, NTNU,  
644 Trondheim, Norway. This unit is not otherwise involved in the trial management or trial  
645 conduct.

646

### 647 3.3 Sample size

648

649 The sample size calculation is described in detail in the registered protocol. Briefly, the study  
650 aims to detect a four-point difference between the intervention groups, i.e. SELFBACK and e-  
651 Help and the control group in musculoskeletal health measured by the MSK-HQ at three  
652 months follow-up. Using the *sampsi* procedure within Stata, assuming a standard deviation of  
653 the MSK-HQ score of 10 points and a correlation between repeated measures of 0.4 and a  
654 30% drop-out, a sample size of at least 279 participants (93 in each arm) will be included in  
655 this trial.

656

### 657 3.4 Framework

658

659 This trial is designed as a superiority RCT assessing the effectiveness of digital interventions  
660 (i.e., the SELFBACK DSS or the e-Help website) in addition to usual care, compared to usual  
661 care only (control group) for people with LBP and/or NP. Three comparisons will be  
662 performed, SELFBACK vs usual care (primary analysis), e-Help vs usual care and SELFBACK  
663 vs e-Help (secondary analyses).

664

### 665 3.5 Interim analyses and stopping guidance

666

667 As serious adverse events are unexpected, no interim analysis or a priori defined stopping  
668 rules are defined or implemented for this trial.

669

### 670 3.6 Timing of outcome assessment

671

672 The primary and secondary outcome variables will be assessed at baseline and at six weeks,  
673 three months, and six months follow-up. This allows analyses of repeated measures on both  
674 primary and secondary outcomes, and thus increased statistical power compared to outcomes  
675 assessed at a single time-point.

676

### 677 3.7 Timing of final analyses

678

679 The analyses of the primary outcome will be conducted within three months after the last  
680 participant has completed the six months follow-up questionnaire. The inclusion of  
681 participants continued until April 2021, and thus the final analyses should be ready by end of  
682 January 2022. Analyses of secondary outcomes assessed at three and six months will be  
683 analysed subsequently to the primary outcome and conducted within the same time frame.

684

## 685 Section 4: Statistical Principles

#### 686 4.1 Confidence intervals and P-values

687

688 As recently recommended in the medical literature, we will not use a specific *P*-value  
689 threshold to decide upon statistical significance as this often leads to misinterpretation of  
690 results. For the same reasons, we will not adjust for multiple comparisons since this build  
691 upon a strict use of a certain *P*-value threshold. Instead, the precision of the estimated effects  
692 of the intervention will be assessed by a 95% confidence interval, and the effect will be  
693 described as a point estimate (mean difference or odds ratio/relative risk) with accompanying  
694 confidence limits. Whenever *P*-values are reported, we will do so by presenting their actual  
695 value, and not reduce them to a binary inequality under or above a threshold value.

696

#### 697 4.2 Adherence and protocol deviations

698

699 The first login to the SELFBACK app and e-Help website will be monitored to check if  
700 participants accessed the allocated intervention. Participants who do not access the  
701 intervention after the reminders or want to discontinue its use will be followed up as usual.  
702 Data analytics on usage and interaction with the app/web interventions will be available as an  
703 indirect measure of adherence. There is currently no optimal way to measure adherence in  
704 self-management interventions<sup>5-7</sup> which makes it challenging to establish a per-protocol  
705 analysis. Additionally, there is a risk that a per-protocol analysis can be biased if participants  
706 who engage with the digital intervention have different prognosis from those who engage less  
707 with it. As such, the primary analysis will include all participants enrolled in the study (see  
708 4.3 for details), but we will conduct supplementary exploratory analyses in subgroups  
709 according to different definitions of adherence: 1) restricted to participants who have  
710 accessed the app or web page; and 2) have had a certain level of engagement with the  
711 SELFBACK app, e.g. having generated six self-management plans during the first twelve  
712 weeks after enrolment.

713

#### 714 4.3 Analysis populations

715

716 The main effect of the intervention will be analysed according to the intention-to-treat  
717 principle using linear mixed models for continuous outcomes and generalized estimated  
718 equations (GEE) for binary outcomes (logistic and Poisson models), and the analyses will  
719 include all participants initially enrolled in the study and who answered the baseline  
720 questionnaire and were randomised. The web-based baseline questionnaire does not allow  
721 participants to proceed without filling in an answer, so there will be no missing data at this  
722 time point. A similar solution will be used for the follow-up questionnaires, but missing data  
723 will be generated if participants do not answer the follow-up questionnaire (i.e. due to  
724 withdrawal or loss to follow-up).

725 Any missing values throughout the follow-up period are inherently accounted for in  
726 the mixed model approach and complete case analysis will be applied in sensitivity analyses  
727 (see chapter 6.2 and 6.3 below for further details). A complete case will be defined as a  
728 participant who has answered both the baseline and the three-month questionnaire. We will  
729 also conduct supplementary exploratory analyses only including participants from the  
730 intervention arm who are defined as adhering to the intervention (see chapter 4.2 for more  
731 details).

732

### 733 Section 5: Trial Population

## 734 5.1 Screening data

735

736 The trial does not aim to collect any screening data to describe the representativeness of the  
737 sample.

738

## 739 5.2 Eligibility

740

741 Detailed inclusion and exclusion criteria are described in the registered protocol. Briefly,  
742 participants must be  $\geq 18$  years, referred and accepted to a secondary care hospital outpatient  
743 clinic for LBP and/or NP and own a smartphone with internet access. Participants are  
744 excluded if they have 'red flags' indicating possible serious pathology, if they are unable to  
745 take part in exercise of physical activity or unable to speak and/or read Norwegian.

746

## 747 5.3 Recruitment

748

749 The recruitment of participants is conducted in Trondheim at the multidisciplinary outpatient  
750 clinic for back-, neck-, and shoulder rehabilitation at St. Olavs Hospital. The recruitment was  
751 conducted between July 2020 and April 2021 and details about the number of participants  
752 contacted and included in the trial will be visualised in the CONSORT flow-chart.

753

## 754 5.4 Withdrawal and follow-up

755

756 Each participant is informed that they can withdraw from the study at any time, and that they  
757 then have the right to have any personal, health and questionnaire data deleted. If a  
758 participant withdraws during the follow-up period, but do not require already collected data  
759 to be deleted, the data will be used in the analyses until the time point for withdrawal. For  
760 analyses of the primary and secondary outcomes at three months, loss to follow-up is defined  
761 as not answering the three-month questionnaire. Loss-to-follow-up will be assessed for each  
762 outcome variable separately. The same principle to define loss-to-follow-up will be used for  
763 the six-month follow-up time point. The number of participants providing information at each  
764 follow-up time point will be visualised in the CONSORT flow-chart, and this also displays  
765 the number who withdrew or were lost to follow-up between each follow-up time-point.

766

## 767 5.5. Baseline patient characteristics

768

769 Eligible participants fill in a baseline web questionnaire after consenting to take part in the  
770 study. Baseline characteristics that are collected include: age, sex, height, weight, housing  
771 (live alone or with family), education, employment, work characteristics, physical activity,  
772 sleep problems, mental health, stress, quality of life, and various pain-related factors (e.g.,  
773 localisation, duration, intensity, coping, disability and limitations, perceptions and beliefs).  
774 Depending on the nature of the variables, we will summarise this information in a baseline  
775 table showing mean values with standard deviation or numbers and percentages within the  
776 three trial arms. We will not conduct any statistical tests of baseline differences, as this  
777 violates the assumptions for the randomisation procedure.

778

## 779 Section 6: Analyses

## 6.1 Outcome definitions

All outcome variables described below are assessed at baseline, six weeks, three, and six months. The primary follow-up time point is three months, both for the primary and secondary outcome variables described below. For each follow-up period, all measures will inform the analyses (e.g. baseline, six-week and six-month data will be included when analysing effects at three months).

### Primary outcome variable

The primary outcome is the mean difference in musculoskeletal health assessed at three months from baseline, measured by the MSK-HQ<sup>8</sup>. The questionnaire contains 14 items assessing severity of pain/stiffness, physical function, physical activity level, symptoms interference, sleep, fatigue, emotional health, understanding of the condition, confidence to self-manage, independence and overall impact of symptoms. Each item is scored from 0 to 4 and are summed to provide a final score (range 0-56), with higher scores indicating better musculoskeletal health. The main analyses will be based on the raw scores, and we will estimate mean group differences in MSK-HQ at three months using a linear mixed model for repeated measures. We will also construct a binary variable representing a clinically meaningful change in MSK-HQ of four points or more during the three months follow-up period that will be analysed using a Poisson GEE analyses for repeated measures to estimate relative risks.

### Secondary outcome variables

- *The Roland Morris Disability Questionnaire (RMDQ)* will be used to assess pain-related disability<sup>9</sup>. The RMDQ includes 24 items asking participants to indicate if they experience functional impairments by answering “yes” or “no” to a series of descriptions of functional abilities. The RMDQ score ranges from 0 to 24, where a higher score indicates higher levels of pain-related disability. We will compare mean group differences in RMDQ using a linear mixed model for repeated measures. There is no consensus on what constitute a clinically meaningful improvement on RMDQ, i.e., this may vary from two to four points<sup>10-13</sup>. We will construct a binary variable representing a clinically meaningful change in RMDQ defined as four points.
- *Neck Disability Index (NDI)* will be used to assess neck-specific disability<sup>14</sup>. The questionnaire has 10 items regarding pain and activities of daily living including personal care, lifting, reading, headaches, concentration, work status, driving, sleeping and recreation. The NDI score ranges from 0 to 50 with higher scores indicating greater disability. We will compare mean group differences in NDI using a linear mixed model for repeated measures. Although it is not clear what constitutes a clinically meaningful improvement on NDI<sup>14 15</sup> we will construct a binary variable using 7.5 points as cut-off value.
- *Pain intensity* over the past week will be assessed by asking “Please indicate your average/worst low back and/or neck pain level during the last week“, using an 11-point numerical rating scale (NRS) ranging from “0 (zero)” to “10”<sup>16</sup>. We will compare mean group differences in pain intensity using linear mixed models. We will also construct a binary variable to indicate moderate/severe pain (>5 points).
- *Health-related quality of life* is evaluated with the EuroQoL 5-dimension (EQ-5D) questionnaire<sup>17</sup>. A 5-point Likert scale ranging from “1 [no problems]” to “5 [complete inability]” is used to assess the health-related quality of life within each of



830 the five dimensions (i.e., mobility, self-care, activities, pain/discomfort and  
831 anxiety/depression). We will construct an overall weighted index based on a value set  
832 that combines all items and then estimate the mean difference between groups using  
833 linear mixed models.

- 834 • *General health* is assessed on a 100-point vertical scale where 0 indicates the worst  
835 health you can imagine and 100 the best imaginable health<sup>17</sup>. The variable will be  
836 analysed as a continuous variable estimating the mean difference between groups  
837 using linear mixed models.
- 838 • *The Pain Self-Efficacy Questionnaire* (PSEQ) assesses the participant's level of  
839 confidence in carrying out specific activities despite their pain<sup>18</sup>. The PSEQ is a 10-  
840 item questionnaire scored on an ordinal scale ranging from "zero [completely  
841 disagree]" to "six [completely agree]". A total score is calculated by summing the  
842 scores for each of the 10 items, yielding a maximum total score of 60, where higher  
843 scores reflect stronger self-efficacy beliefs. We will compare mean group differences  
844 in PSEQ using linear mixed models. We will also construct a binary variable to  
845 indicate low and high self-efficacy using a cut-off value of 40.
- 846 • *The Brief Illness Perception Questionnaire* (BIPQ) evaluates the participants' illness  
847 perception in an 8-item questionnaire<sup>19</sup>. Items are scored on an ordinal scale ranging  
848 from "0 [no problems]" to "10 [worst severity]". Adding the separate score values  
849 creates a summary score with a higher score indicating more threatening view of the  
850 pain. The summed score will be analysed as a continuous variable to compare mean  
851 group differences, and we will also construct a binary variable with cut-offs indicated  
852 from the distribution of the variable (e.g. percentiles) since no clinical cut offs are  
853 suggested in the literature.
- 854 • *The Fear-Avoidance Belief Questionnaire* (FABQ) assesses participant's beliefs about  
855 how physical activity and work affect their pain<sup>20</sup>. The FABQ is a 5-item  
856 questionnaire, where the participants score their beliefs about their pain on an ordinal  
857 scale ranging from "zero [completely disagree]" to "six [completely agree]". The four  
858 latter questions will be summed (range 0-24) to represent fear avoidance beliefs about  
859 physical activity and analysed as a continuous variable to compare mean group  
860 differences using linear mixed models. We will also classify people as having high or  
861 low fear for physical activity to examine possible differences in a binary variable. The  
862 classification cut-off will be obtained from the distribution of the variable (i.e.,  
863 median value).
- 864 • *Stress* is evaluated with the Perceived Stress Scale (PSS), a 10-item questionnaire  
865 asking about frequency of thoughts and feelings related to perceived stress<sup>21</sup>.  
866 Participants indicate their frequency of experiencing stress-related issues on a 5-point  
867 Likert scale, ranging from "0 [never]" to "4 [very often]". Positive score items are  
868 reversed and then all items are summed to a score ranging from 0 to 40. The resulting  
869 sum score will be analysed as a continuous variable to estimate mean differences in  
870 stress using linear mixed models. A score  $\geq 27$  is considered high stress and will be  
871 used as cut-off value to construct a binary variable.
- 872 • *The Patient Health Questionnaire-8* (PHQ-8) is an 8-item questionnaire used to  
873 evaluate the participants' depressive symptoms<sup>22</sup>. Items are reported on a 4-point  
874 Likert scale scoring frequency of experiencing symptoms of depression. The nine  
875 items will be summed and analysed both as a continuous variable using linear mixed  
876 models and as a binary variable using a cut-off 15 to classify people into  
877 none/mild/moderate versus moderately severe/severe depression.
- 878 • *Function* is evaluated by the Patient Specific Functional Scale (PSFS) where  
879 participants are asked to rate up to two self-selected activities they are unable to do or

880 having difficulties performing<sup>23</sup>. The ability to carry out the activity/activities is rated  
881 from “zero [unable to perform]” to “10 [fully able to perform]”. We will compare  
882 mean difference in function using linear mixed models.

- 883 • *Self-reported physical activity* is evaluated by the Modernised Saltin-Grimby Physical  
884 Activity Level Scale, where participants indicate their amount of time per week  
885 performing leisure activities with four levels of intensity ranging from sedentary to  
886 vigorous physically active<sup>24</sup>. The resulting four categories will be analysed as a binary  
887 variable indicating no/light activity vs moderate/vigorous activity.
- 888 • *Sleep problems* is assessed by four items including problems with falling asleep,  
889 waking up repeatedly, waking up too early, and feeling sleepy during the day<sup>25</sup>.  
890 Response options for each item are “seldom or never”, “sometimes” or “several times  
891 a week”. The information retrieved from these four items approximates the  
892 information necessary to diagnose insomnia according to the DSM-V criteria, and will  
893 be analysed as a binary variable (insomnia vs no insomnia).
- 894 • *Work ability* is measured by a single-item on current work ability rated on an 11-point  
895 NRS scale ranging from “zero [completely unable to work]” to “10 [work ability at its  
896 best]”<sup>26</sup>. We will compare mean difference in work ability using linear mixed models.  
897 We will also classify people into a binary variable representing high (>7 points) vs  
898 low work ability.
- 899 • *Patient Acceptable Symptom State* is a single item question: “Considering your pain,  
900 do you consider your current state satisfactory?” with response options yes or no<sup>27</sup>.  
901 This will be analysed as a binary variable.
- 902 • *Patient’s Global Perceived Effect* is a single item question where participants are  
903 asked to rate improvement or deterioration of their pain status compared to before the  
904 intervention with seven response options ranging from -5 [markedly worse] to 5  
905 [markedly better]<sup>28</sup>. The variable will be analysed as a binary variable indicating  
906 improved vs not improved.
- 907 • *Pain medication* is collected by the question “How many days during the last week  
908 have you taken non-prescription pain medication for your pain?” with four response  
909 options ranging from “never” to “daily”. Although this information is collected at  
910 follow-up the variable will not be included as a secondary outcome.
- 911 • *Long term pain duration* is measured by “What is the total length of time that you  
912 have had low back or neck trouble during the last 12 months?” with five response  
913 options ranging from “0 days” to “every day”. Although this information is collected  
914 at follow-up the variable will not be included as a secondary outcome.

915

916

## 917 6.2 Analyses methods

918

919 The primary analysis will estimate mean difference and 95% confidence interval (CI) in  
920 MSK-HQ score at three months follow-up between the intervention and control group (i.e.,  
921 SELFBACK in addition to usual care versus usual care only). The analyses will be conducted  
922 according to the intention-to-treat principle using a linear mixed model for repeated  
923 measures. This model includes all available data for all participants at each time point (i.e.  
924 baseline, six weeks, and three months). The distribution of the MSK-HQ score will be  
925 assessed, and the variable may be transformed (e.g. log transformation) to better fit with the  
926 assumptions for the regression analyses. In the regression model, individual participants will  
927 be specified as a random effect, accounting for the within subject covariance structure. The  
928 effect of group and time will be specified as fixed effects using a joint variable of

929 intervention and time in a constrained longitudinal data analysis approach. Here, baseline  
 930 levels are pooled over the two study groups assuming that any baseline differences are due to  
 931 chance; this also controls for any baseline differences in the outcome variable. The same  
 932 approach will be used for the other two comparisons, i.e. e-Help website vs usual care and  
 933 SELFBACK vs e-Help website.

934 All analyses will include adjustment for baseline levels of potentially important  
 935 prognostic factors, such as age, sex, socioeconomic status, and pain intensity. We will also  
 936 use Poisson GEE analyses to estimate relative risk (with 95% CI) for a four-point change in  
 937 MSK-HQ between the groups taking into account the repeated observations. This analysis  
 938 will be adjusted for the same factors as those included in the linear mixed model.

939 To reduce the risk of biased interpretation of results for the primary outcome we will  
 940 draft separate interpretations based on the results from the main analyses, with groups  
 941 arbitrarily labelled as A, B, and C (Table 2). After agreeing on the interpretations, the  
 942 randomisation code is broken, and the correct interpretation will be used.

943

944 Table 2. An interpretation will be drafted for each of the six possible combinations of group  
 945 labelling before unblinding the group allocation.

| Label | Interpret. 1 | Interpret. 2 | Interpret. 3 | Interpret. 4 | Interpret. 5 | Interpret. 6 |
|-------|--------------|--------------|--------------|--------------|--------------|--------------|
| A     | SELFBACK     | SELFBACK     | e-Help       | e-Help       | Control      | Control      |
| B     | e-Help       | Control      | SELFBACK     | Control      | e-Help       | SELFBACK     |
| C     | Control      | e-Help       | Control      | SELFBACK     | SELFBACK     | e-Help       |

946

947 In addition to the intention to treat analyses, we will conduct supplementary exploratory per  
 948 protocol analyses using information on adherence to the trial as described in chapter 4.2  
 949 above.

950 All secondary outcomes will be analysed using the same approach as described for the  
 951 primary outcome; linear mixed models will be used to estimate mean differences between  
 952 groups in continuous variables, and for binary variables we will use Poisson GEE analyses to  
 953 estimate relative risk. Pre-specified cut-offs for binary variables are described in 6.1 above.  
 954 For analyses of mean differences, the distribution of each outcome variable will be assessed  
 955 to inform possible transformation or initiate alternative analytical procedures (e.g. non-  
 956 parametric analyses). The precision of all estimated effects will be assessed by a 95% CI.

957 Possible modifiers of the effect of intervention on the primary outcome will be  
 958 assessed in supplementary analyses stratified by sex, age groups, socioeconomic status and  
 959 different levels of pain severity etc., and accompanied by tests of statistical interaction to  
 960 assess departure from additive effects (i.e., including a product term of group and modifier in  
 961 the regression model).

962

### 963 6.3 Missing data

964

965 Any missing values are inherently accounted for in the mixed model/GEE approach assuming  
 966 that the data are missing at random. We will also conduct complete case analyses including  
 967 people with data on all time-points.

968

### 969 6.4 Additional analyses

970

971 Additional analyses include exploratory analyses, analyses of secondary outcomes, analyses  
 972 stratified by possible effect modifiers, analyses using multiple imputation of missing data and  
 973 complete case analyses. These analyses are described above in chapter 6.1-6.3.

974 6.5 Harms

975

976 Since no harms are expected, we do not plan any specific analyses for this. If any study  
977 related harms should occur, these will be described and reported.

978

979 6.6 Statistical software

980

981 All analyses related to the primary outcome will be conducted using Stata.

## References

982  
983  
984  
985  
986  
987  
988  
989  
990  
991  
992  
993  
994  
995  
996  
997  
998  
999  
1000  
1001  
1002  
1003  
1004  
1005  
1006  
1007  
1008  
1009  
1010  
1011  
1012  
1013  
1014  
1015  
1016  
1017  
1018  
1019  
1020  
1021  
1022  
1023  
1024  
1025  
1026  
1027  
1028  
1029  
1030  
1031  
1032  
1033

1. Gamble C, Krishan A, Stocken D, et al. Guidelines for the content of statistical analysis plans in clinical trials. *Jama* 2017;318(23):2337-43.
2. Lin I, Wiles L, Waller R, et al. What does best practice care for musculoskeletal pain look like? Eleven consistent recommendations from high-quality clinical practice guidelines: systematic review. *British journal of sports medicine* 2020;54(2):79-86.
3. Kamper SJ, Logan G, Copsey B, et al. What is usual care for low back pain? A systematic review of health care provided to patients with low back pain in family practice and emergency departments. *Pain* 2020;161(4):694-702.
4. Mork PJ, Bach K. A decision support system to enhance self-Management of low Back Pain: protocol for the selfBACK project. *JMIR research protocols* 2018;7(7):e167.
5. Widmer RJ, Senecal C, Allison TG, et al. Dose-Response Effect of a Digital Health Intervention During Cardiac Rehabilitation: Subanalysis of Randomized Controlled Trial. *Journal of medical Internet research* 2020;22(2):e13055.
6. Donkin L, Hickie IB, Christensen H, et al. Rethinking the dose-response relationship between usage and outcome in an online intervention for depression: randomized controlled trial. *Journal of medical Internet research* 2013;15(10):e231.
7. Mattila E, Lappalainen R, Väikkynen P, et al. Usage and dose response of a mobile acceptance and commitment therapy app: secondary analysis of the intervention arm of a randomized controlled trial. *JMIR mHealth and uHealth* 2016;4(3):e5241.
8. Hill JC, Kang S, Benedetto E, et al. Development and initial cohort validation of the Arthritis Research UK Musculoskeletal Health Questionnaire (MSK-HQ) for use across musculoskeletal care pathways. *BMJ open* 2016;6(8):e012331.
9. Roland M, Morris R. A Study of the Natural History of Back Pain: Part I Development of a Reliable and Sensitive Measure of Disability in Low-Back Pain. *spine* 1983;8(2):141-44.
10. Jordan K, Dunn KM, Lewis M, et al. A minimal clinically important difference was derived for the Roland-Morris Disability Questionnaire for low back pain. *Journal of clinical epidemiology* 2006;59(1):45-52.
11. Ostelo RW, Deyo RA, Stratford P, et al. Interpreting change scores for pain and functional status in low back pain: towards international consensus regarding minimal important change. *Spine* 2008;33(1):90-94.
12. Stratford PW, Binkley JM, Riddle DL, et al. Sensitivity to change of the Roland-Morris back pain questionnaire: part 1. *Physical therapy* 1998;78(11):1186-96.
13. Ostelo RW, de Vet HC. Clinically important outcomes in low back pain. *Best Practice & Research Clinical Rheumatology* 2005;19(4):593-607.
14. Pool JJ, Ostelo RW, Hoving JL, et al. Minimal clinically important change of the Neck Disability Index and the Numerical Rating Scale for patients with neck pain. *Spine* 2007;32(26):3047-51.
15. Young BA, Walker MJ, Strunce JB, et al. Responsiveness of the Neck Disability Index in patients with mechanical neck disorders. *The Spine Journal* 2009;9(10):802-08.
16. Hawker GA, Mian S, Kendzerska T, et al. Measures of adult pain: Visual analog scale for pain (vas pain), numeric rating scale for pain (nrs pain), mcgill pain questionnaire (mpq), short-form mcgill pain questionnaire (sf-mpq), chronic pain grade scale (cpgs), short form-36 bodily pain scale (sf-36 bps), and measure of intermittent and constant osteoarthritis pain (icoap). *Arthritis care & research* 2011;63(S11):S240-S52.
17. Brooks R, Group E. EuroQol: the current state of play. *Health policy* 1996;37(1):53-72.
18. Nicholas MK. The pain self-efficacy questionnaire: taking pain into account. *European journal of pain* 2007;11(2):153-63.
19. Hallegraeff JM, van der Schans CP, Krijnen WP, et al. Measurement of acute nonspecific low back pain perception in primary care physical therapy: reliability and validity of the brief illness perception questionnaire. *BMC musculoskeletal disorders* 2013;14(1):1-7.

- 1034 20. Waddell G, Newton M, Henderson I, et al. A Fear-Avoidance Beliefs Questionnaire (FABQ) and  
1035 the role of fear-avoidance beliefs in chronic low back pain and disability. *Pain*  
1036 1993;52(2):157-68.
- 1037 21. Cohen S, Kamarck T, Mermelstein R. A global measure of perceived stress. *Journal of health and*  
1038 *social behavior* 1983:385-96.
- 1039 22. Kroenke K, Strine TW, Spitzer RL, et al. The PHQ-8 as a measure of current depression in the  
1040 general population. *Journal of affective disorders* 2009;114(1-3):163-73.
- 1041 23. Hefford C, Abbott JH, Arnold R, et al. The patient-specific functional scale: validity, reliability,  
1042 and responsiveness in patients with upper extremity musculoskeletal problems. *journal of*  
1043 *orthopaedic & sports physical therapy* 2012;42(2):56-65.
- 1044 24. Grimby G, Börjesson M, Jonsdottir I, et al. The “Saltin–Grimby Physical Activity Level Scale”  
1045 and its application to health research. *Scandinavian journal of medicine & science in sports*  
1046 2015;25:119-25.
- 1047 25. Engström M, Ødegård SS, Sand T, et al. The reliability of a new sleep screening questionnaire for  
1048 large population-based studies: the third nord-trøndelag health study. *The Open Sleep Journal*  
1049 2011;4(1)
- 1050 26. Ahlstrom L, Grimby-Ekman A, Hagberg M, et al. The work ability index and single-item  
1051 question: associations with sick leave, symptoms, and health—a prospective study of women  
1052 on long-term sick leave. *Scandinavian journal of work, environment & health* 2010:404-12.
- 1053 27. Salaffi F, Carotti M, Gutierrez M, et al. Patient acceptable symptom state in self-report  
1054 questionnaires and composite clinical disease index for assessing rheumatoid arthritis activity:  
1055 identification of cut-off points for routine care. *BioMed research international* 2015;2015
- 1056 28. Kamper SJ, Ostelo RW, Knol DL, et al. Global Perceived Effect scales provided reliable  
1057 assessments of health transition in people with musculoskeletal disorders, but ratings are  
1058 strongly influenced by current status. *Journal of clinical epidemiology* 2010;63(7):760-66. e1.
