# Supplementary material for: Effect of an Artificial Intelligence–Based Self-Management App on Musculoskeletal Health in Patients With Neck and/or Low Back Pain Referred to Specialist Care: A Randomized Clinical Trial
Source: PubMed Central journal article supplement (PMC10300712; doi:10.1001/jamanetworkopen.2023.20400), 2023-06-27
Supplement: jamanetwopen-e2320400-s002.pdf [file jamanetwopen-e2320400-s002.pdf]

## Supplementary Online Content

Marcuzzi A, Nordstoga AL, Bach K, et al. Effect of an artificial intelligence–based self-management app on musculoskeletal health in patients with neck and/or low back pain referred to specialist care: a randomized clinical trial. *JAMA Netw Open*. 2023;6(6):e2320400. doi:10.1001/jamanetworkopen.2023.20400

**eFigure.** Start Screen of the SELFBACK App (Left) and 3 Main Components of the Weekly Self-Management Plan (Physical Activity [Steps], Exercise, and Education)

**eTable 1.** Mean (SD) and Between-Group Differences in Primary Outcome at 3 Months for All Sensitivity Analyses

**eTable 2.** Proportion of Participants Who Reported Improvement and Group Comparisons at 3-Month and 6-Month Follow-up for Disability Outcomes

**eTable 3.** Odds Ratios for Secondary Binary Outcomes Comparing Groups at 3 Months and 6 Months

**eTable 4.** Mean (SD) and Between-Group Differences for Exploratory Outcome at 3 Months and 6 Months

**eTable 5.** Odds Ratios for Exploratory Binary Outcomes Comparing Groups at 3 Months and 6 Months

This supplemental material has been provided by the authors to give readers additional information about their work.

**eFigure.** Start Screen of the SELFBACK App (Left) and 3 Main Components of the Weekly Self-Management Plan (Physical Activity [Steps], Exercise, and Education)

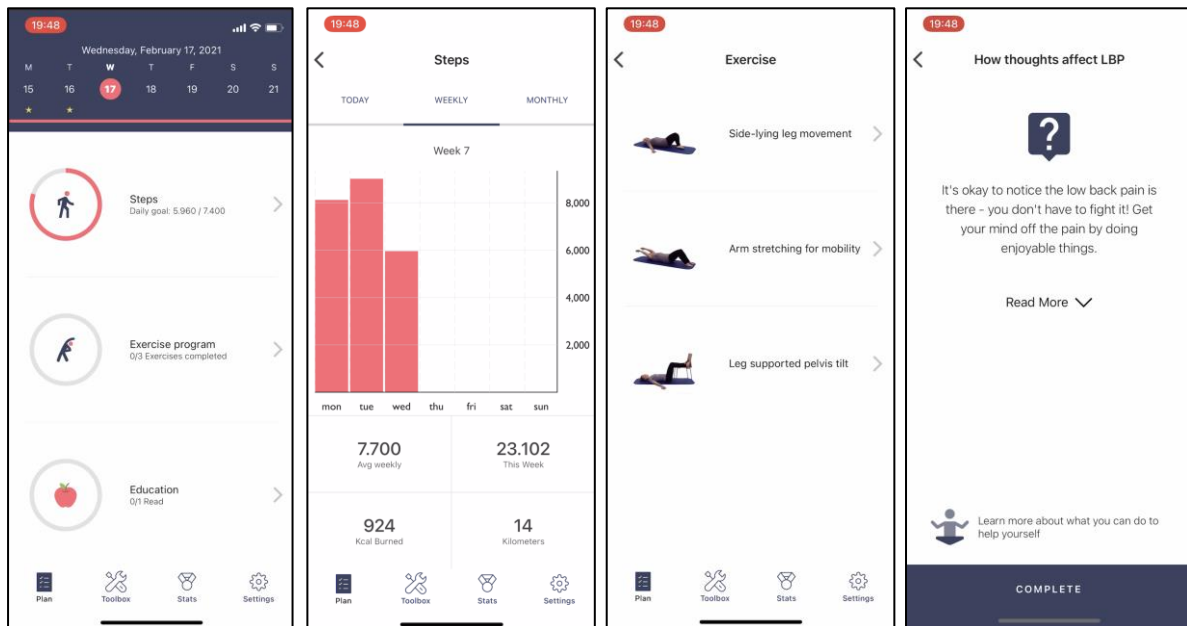

**eTable 1.** Mean (SD) and Between-Group Differences in Primary Outcome at 3 Months for All Sensitivity Analyses

| Musculoskeletal Health Questionnaire       | Mean (SD) <sup>a</sup> |                                |                              | SELFBACK vs Usual Care                                | SELFBACK vs e-Help                                    |
|--------------------------------------------|------------------------|--------------------------------|------------------------------|-------------------------------------------------------|-------------------------------------------------------|
|                                            | Usual Care (n = 97)    | SELFBACK <sup>b</sup> (n = 99) | e-Help <sup>c</sup> (n = 98) | Between-group differences, mean (95% CI) <sup>d</sup> | Between-group differences, mean (95% CI) <sup>d</sup> |
| Multiple imputation analyses (n=294)       |                        |                                |                              |                                                       |                                                       |
| Baseline                                   | 29.2 (8.5)             |                                |                              |                                                       |                                                       |
| 3 months                                   | 33.8 (10.1)            | 34.6 (10.2)                    | 33.2 (11.0)                  | 0.62 (-1.67 to 2.90)                                  | 1.08 (-1.24 to 3.41)                                  |
| 6 months                                   | 35.5 (10.4)            | 36.4 (9.9)                     | 33.4 (10.5)                  | 0.48 (-2.22 to 3.18)                                  | 2.44 (-0.25 to 5.12)                                  |
| Complete case analyses (n=158)             |                        |                                |                              |                                                       |                                                       |
| Baseline                                   | 30.4 (8.3)             |                                |                              |                                                       |                                                       |
| 3 months                                   | 34.7 (9.1)             | 36.4 (9.3)                     | 33.4 (11.0)                  | 1.24 (-1.55 to 4.04)                                  | 2.44 (-0.38 to 5.26)                                  |
| 6 months                                   | 36.5 (10.5)            | 37.5 (9.9)                     | 34.7 (10.3)                  | 0.54 (-2.26 to 3.33)                                  | 2.12 (-0.70 to 4.94)                                  |
| Per protocol analysis <sup>e</sup> (n=257) |                        |                                |                              |                                                       |                                                       |
| Baseline                                   | 29.0 (8.4)             |                                |                              |                                                       |                                                       |
| 3 months                                   | 33.7 (10.1)            | 34.5 (10.0)                    | 33.4 (10.8)                  | 0.62 (-1.83 to 3.06)                                  | 0.84 (-1.68 to 3.35)                                  |
| 6 months                                   | 35.4 (10.4)            | 36.2 (10.2)                    | 33.2 (10.5)                  | 0.19 (-2.74 to 3.12)                                  | 2.16 (-0.78 to 5.11)                                  |
| Per protocol analysis <sup>f</sup> (n=135) |                        |                                |                              |                                                       |                                                       |
| Baseline                                   | 29.5 (9.2)             |                                |                              |                                                       |                                                       |
| 3 months                                   | 34.0 (10.1)            | 36.8 (9.3)                     | ---                          | 2.39 (-0.43 to 5.21)                                  | ---                                                   |
| 6 months                                   | 35.6 (10.4)            | 37.5 (9.8)                     | ---                          | 1.09 (-2.25 to 4.44)                                  | ---                                                   |

Abbreviations: SD, Standard Deviation; CI, Confidence Interval

<sup>a</sup> Marginal means from a crude linear mixed model and SDs from raw data among persons with information at the specific time points

<sup>b</sup> App-delivered self-management support in addition to usual care

<sup>c</sup> Web-based self-management support in addition to usual care

<sup>d</sup> Adjusted for age (years), sex (male, female), education (<10, 10-12, >12 years), average pain intensity past week at baseline (continuous, range 0-10)

<sup>e</sup> Adherence to the protocol was defined as accessing the intervention at least once for both intervention groups (SELFBACK group: n=70; e-Help group: n=90)

<sup>f</sup> Adherence to the protocol was defined as creating at least 6 weekly self-management plans during the first 12 weeks post randomization for SELFBACK group only (n=38)

**eTable 2.** Proportion of Participants Who Reported Improvement and Group Comparisons at 3-Month and 6-Month Follow-up for Disability Outcomes

|                                                           | Usual Care                 |                          | SELFBACK <sup>b</sup>      |                          | e-Help <sup>c</sup>        |                          | SELFBACK vs Usual Care                              | SELFBACK vs e-Help                                  |
|-----------------------------------------------------------|----------------------------|--------------------------|----------------------------|--------------------------|----------------------------|--------------------------|-----------------------------------------------------|-----------------------------------------------------|
|                                                           | No. improved/<br>No. total | OR (95% CI) <sup>a</sup> | No. improved/<br>No. Total | OR (95% CI) <sup>a</sup> | No. improved/<br>No. Total | OR (95% CI) <sup>a</sup> | Between-Group Differences, OR (95% CI) <sup>a</sup> | Between-Group Differences, OR (95% CI) <sup>a</sup> |
| <b>Improvement in RMDQ &amp; NDI combined<sup>d</sup></b> |                            |                          |                            |                          |                            |                          |                                                     |                                                     |
| Baseline                                                  | 0/97                       | N/A                      | 0/99                       | N/A                      | 0/98                       | N/A                      | N/A                                                 | N/A                                                 |
| 3 months                                                  | 17/84                      | 1.05 (0.60 to 1.84)      | 20/75                      | 1.56 (0.74 to 3.31)      | 25/77                      | 2.05 (0.98 to 4.26)      | 1.48 (0.70 to 3.14)                                 | 0.76 (0.38 to 1.52)                                 |
| 6 months                                                  | 25/59                      | 3.19 (1.62 to 6.26)      | 15/52                      | 1.97 (0.88 to 4.41)      | 21/61                      | 2.30 (1.05 to 5.00)      | 0.62 (0.28 to 1.34)                                 | 0.86 (0.39 to 1.89)                                 |

Abbreviations: CI, Confidence Interval; OR, Odds Ratio; RMDQ, Roland Morris Disability Questionnaire; NDI, Neck Disability Index; N/A, Not Applicable

<sup>a</sup> Adjusted for age (years), sex (male, female), education (<10, 10-12, >12 years), average pain intensity past week at baseline (continuous, range 0-10)

<sup>b</sup> App-delivered self-management support in addition to usual care

<sup>c</sup> Web-based self-management support in addition to usual care

<sup>d</sup> Improvement from baseline to follow up corresponds to a change of ≥4-points in RMDQ for people with low back pain only; or to a change of >7-point in NDI for people with neck pain only; or to either a change of ≥4-points in RMDQ or >7-point in NDI for people with both low back and neck pain.

**eTable 3.** Odds Ratios for Secondary Binary Outcomes Comparing Groups at 3 Months and 6 Months

|                                                                      | Usual Care                 |                          | SELFBACK <sup>b</sup>      |                          | e-Help <sup>c</sup>        |                          | SELFBACK vs Usual Care                              | SELFBACK vs e-Help                                  |
|----------------------------------------------------------------------|----------------------------|--------------------------|----------------------------|--------------------------|----------------------------|--------------------------|-----------------------------------------------------|-----------------------------------------------------|
|                                                                      | No. improved/<br>No. Total | OR (95% CI) <sup>a</sup> | No. improved/<br>No. Total | OR (95% CI) <sup>a</sup> | No. improved/<br>No. Total | OR (95% CI) <sup>a</sup> | Between-group differences, OR (95% CI) <sup>a</sup> | Between-group differences, OR (95% CI) <sup>a</sup> |
| <b>Average Pain Intensity Past Week, &gt;5</b>                       |                            |                          |                            |                          |                            |                          |                                                     |                                                     |
| Baseline, all groups                                                 | 149/294                    | 1.00 (reference)         | ---                        | ---                      | ---                        | ---                      | ---                                                 | ---                                                 |
| 3 months                                                             | 29/85                      | 0.52 (0.36 to 0.76)      | 25/76                      | 0.52 (0.34 to 0.80)      | 32/77                      | 0.74 (0.47 to 1.16)      | 1.01 (0.59 to 1.73)                                 | 0.71 (0.39 to 1.28)                                 |
| 6 months                                                             | 21/60                      | 0.55 (0.32 to 0.93)      | 14/53                      | 0.45 (0.26 to 0.79)      | 27/62                      | 0.69 (0.44 to 1.07)      | 0.83 (0.40 to 1.73)                                 | 0.66 (0.33 to 1.31)                                 |
| <b>Worst Pain Intensity Past Week, &gt;5</b>                         |                            |                          |                            |                          |                            |                          |                                                     |                                                     |
| Baseline, all groups                                                 | 241/294                    | 1.00 (reference)         | --                         | --                       | --                         | --                       | --                                                  | --                                                  |
| 3 months                                                             | 51/85                      | 0.38 (0.24 to 0.60)      | 47/76                      | 0.40 (0.26 to 0.62)      | 52/77                      | 0.41 (0.25 to 0.69)      | 1.05 (0.60 to 1.83)                                 | 0.97 (0.53 to 1.76)                                 |
| 6 months                                                             | 33/60                      | 0.29 (0.17 to 0.51)      | 25/53                      | 0.26 (0.15 to 0.44)      | 42/62                      | 0.40 (0.24 to 0.67)      | 0.89 (0.45 to 1.78)                                 | 0.65 (0.34 to 1.28)                                 |
| <b>Pain Self-Efficacy Questionnaire, high (&gt;40)</b>               |                            |                          |                            |                          |                            |                          |                                                     |                                                     |
| Baseline, all groups                                                 | 123/294                    | 1.00 (reference)         | --                         | --                       | --                         | --                       | --                                                  | --                                                  |
| 3 months                                                             | 48/84                      | 1.94 (1.25 to 3.00)      | 48/75                      | 2.28 (1.35 to 3.85)      | 37/77                      | 1.31 (0.83 to 2.06)      | 1.18 (0.62 to 2.25)                                 | 1.74 (0.90 to 3.36)                                 |
| 6 months                                                             | 35/59                      | 2.41 (1.49 to 3.91)      | 33/52                      | 1.57 (0.92 to 2.68)      | 29/59                      | 1.14 (0.75 to 1.74)      | 0.65 (0.32 to 1.31)                                 | 1.37 (0.71 to 2.68)                                 |
| <b>Brief Illness Perception Questionnaire, &gt;75 perc. (&gt;52)</b> |                            |                          |                            |                          |                            |                          |                                                     |                                                     |
| Baseline, all groups                                                 | 69/294                     | 1.00 (reference)         | --                         | --                       | --                         | --                       | --                                                  | --                                                  |
| 3 months                                                             | 12/84                      | 0.60 (0.34 to 1.08)      | 13/75                      | 0.72 (0.42 to 1.24)      | 19/77                      | 1.15 (0.70 to 1.91)      | 1.19 (0.55 to 2.59)                                 | 0.62 (0.30 to 1.28)                                 |
| 6 months                                                             | 7/58                       | 0.53 (0.26 to 1.06)      | 6/52                       | 0.48 (0.18 to 1.30)      | 18/59                      | 1.53 (0.91 to 2.58)      | 0.92 (0.28 to 2.97)                                 | 0.32 (0.11 to 0.93)                                 |
| <b>Global perceived effect, improved</b>                             |                            |                          |                            |                          |                            |                          |                                                     |                                                     |
| Baseline, all groups                                                 | N/A                        |                          | --                         | --                       | --                         | --                       | --                                                  | --                                                  |
| 3 months                                                             | 33/84                      | 1.70 (1.06 to 2.72)      | 39/75                      | 2.65 (1.36 to 5.16)      | 37/77                      | 2.54 (1.31 to 4.94)      | 1.57 (0.83 to 2.94)                                 | 1.04 (0.55 to 1.99)                                 |
| 6 months                                                             | 28/57                      | 2.62 (1.44 to 4.76)      | 26/52                      | 2.48 (1.19 to 5.15)      | 24/59                      | 1.72 (0.85 to 5.15)      | 0.95 (0.45 to 2.00)                                 | 1.44 (0.68 to 3.04)                                 |

Abbreviations: CI, Confidence Interval; OR, odds ratio

<sup>a</sup> Adjusted for age (years), sex (male, female), education (<10, 10-12, >12 years), average pain intensity past week at baseline (continuous, range 0-10)

<sup>b</sup> App-delivered self-management support in addition to usual care

<sup>c</sup> Web-based self-management support in addition to usual care

**eTable 4.** Mean (SD) and Between-Group Differences for Exploratory Outcome at 3 Months and 6 Months

|                                                   | Mean (SD) <sup>a</sup> |                                   |                                 | SELFBACK vs Usual Care                                   | SELFBACK vs e-Help                                       |
|---------------------------------------------------|------------------------|-----------------------------------|---------------------------------|----------------------------------------------------------|----------------------------------------------------------|
|                                                   | Usual Care<br>(n = 98) | SELFBACK <sup>b</sup><br>(n = 99) | e-Help <sup>c</sup><br>(n = 97) | Between-group differences,<br>mean (95% CI) <sup>d</sup> | Between-group differences,<br>mean (95% CI) <sup>d</sup> |
| <b>Fear-Avoidance Belief Questionnaire (0-24)</b> |                        |                                   |                                 |                                                          |                                                          |
| Baseline                                          | 11.2 (6.1)             |                                   |                                 |                                                          |                                                          |
| 3 months                                          | 9.1 (5.8)              | 8.8 (6.1)                         | 8.8 (6.2)                       | -0.24 (-1.69 to 1.21)                                    | 0.16 (-1.32 to 1.63)                                     |
| 6 months                                          | 8.1 (5.3)              | 8.2 (5.4)                         | 8.1 (5.4)                       | 0.19 (-1.50 to 1.88)                                     | 0.33 (-1.35 to 2.02)                                     |
| <b>Perceived Stress Scale (0-40)</b>              |                        |                                   |                                 |                                                          |                                                          |
| Baseline                                          | 16.6 (7.0)             |                                   |                                 |                                                          |                                                          |
| 3 months                                          | 16.7 (7.1)             | 14.8 (7.1)                        | 16.0 (7.8)                      | -1.89 (-3.36 to -0.42)                                   | -1.11 (-2.61 to 0.38)                                    |
| 6 months                                          | 15.5 (7.6)             | 14.7 (7.6)                        | 15.7 (7.1)                      | -0.71 (-2.41 to 1.00)                                    | -0.85 (-2.56 to 0.85)                                    |
| <b>Patient Health Questionnaire-2 (0-6)</b>       |                        |                                   |                                 |                                                          |                                                          |
| Baseline                                          | 1.9 (1.5)              |                                   |                                 |                                                          |                                                          |
| 3 months                                          | 1.8 (1.4)              | 1.6 (1.2)                         | 1.8 (1.7)                       | -0.24 (-0.59 to 0.10)                                    | -0.16 (-0.52 to 0.19)                                    |
| 6 months                                          | 1.8 (1.4)              | 1.6 (1.5)                         | 1.7 (1.4)                       | -0.17 (-0.58 to 0.23)                                    | -0.06 (-0.46 to 0.34)                                    |
| <b>Patient Specific Functional Scale (0-10)</b>   |                        |                                   |                                 |                                                          |                                                          |
| Baseline                                          | 3.1 (2.2)              |                                   |                                 |                                                          |                                                          |
| 3 months                                          | 4.4 (2.9)              | 4.1 (2.8)                         | 4.1 (2.6)                       | -0.29 (-0.95 to 0.37)                                    | -0.59 (-0.73 to 0.61)                                    |
| 6 months                                          | 5.0 (3.2)              | 4.4 (4.6)                         | 4.4 (2.5)                       | -0.61 (-1.38 to 0.16)                                    | -0.02 (-0.79 to 0.75)                                    |
| <b>Work ability (0-10)</b>                        |                        |                                   |                                 |                                                          |                                                          |
| Baseline                                          | 4.5 (2.6)              |                                   |                                 |                                                          |                                                          |
| 3 months                                          | 5.3 (2.4)              | 5.5 (2.4)                         | 5.0 (2.6)                       | 0.20 (-0.38 to 0.79)                                     | 0.45 (-0.14 to 1.05)                                     |
| 6 months                                          | 5.4 (2.7)              | 5.2 (2.6)                         | 5.1 (2.4)                       | -0.24 (0.92 to 0.44)                                     | 0.07 (-0.61 to 0.75)                                     |

Abbreviations: SD, Standard Deviation; CI, Confidence Interval

<sup>a</sup> Marginal means from a crude linear mixed model and SDs from raw data among persons with information at the specific time points

<sup>b</sup> App-delivered self-management support in addition to usual care

<sup>c</sup> Web-based self-management support in addition to usual care

<sup>d</sup> Adjusted for age (years), sex (male, female), education (<10, 10-12, >12 years), average pain intensity past week at baseline (continuous, range 0-10)

**eTable 5.** Odds Ratios for Exploratory Binary Outcomes Comparing Groups at 3 Months and 6 Months

|                                                                   | Usual Care             |                          | SELFBACK <sup>b</sup>  |                          | e-Help <sup>c</sup>    |                          | SELFBACK vs Usual Care                              | SELFBACK vs e-Help                                  |
|-------------------------------------------------------------------|------------------------|--------------------------|------------------------|--------------------------|------------------------|--------------------------|-----------------------------------------------------|-----------------------------------------------------|
|                                                                   | No. improved/No. Total | OR (95% CI) <sup>a</sup> | No. improved/No. Total | OR (95% CI) <sup>a</sup> | No. improved/No. Total | OR (95% CI) <sup>a</sup> | Between-group differences, OR (95% CI) <sup>a</sup> | Between-group differences, OR (95% CI) <sup>a</sup> |
| <b>Fear-Avoidance Belief Questionnaire, &gt;50 perc. (&gt;11)</b> |                        |                          |                        |                          |                        |                          |                                                     |                                                     |
| Baseline, all groups                                              | 145/294                | 1.00 (reference)         |                        |                          |                        |                          |                                                     |                                                     |
| 3 months                                                          | 29/84                  | 0.47 (0.30 to 0.74)      | 25/75                  | 0.49 (0.29 to 0.82)      | 30/77                  | 0.65 (0.40 to 1.04)      | 1.04 (0.54 to 1.98)                                 | 0.76 (0.39 to 1.47)                                 |
| 6 months                                                          | 17/59                  | 0.34 (0.19 to 0.58)      | 15/52                  | 0.44 (0.25 to 0.78)      | 17/60                  | 0.43 (0.26 to 0.74)      | 1.30 (0.60 to 2.82)                                 | 1.01 (0.48 to 2.13)                                 |
| <b>Perceived Stress Scale, high (&gt;27)</b>                      |                        |                          |                        |                          |                        |                          |                                                     |                                                     |
| Baseline, all groups                                              | 22/294                 | 1.00 (reference)         |                        |                          |                        |                          |                                                     |                                                     |
| 3 months                                                          | 8/84                   | 1.45 (0.61 to 3.47)      | 2/75                   | 0.36 (0.11 to 1.13)      | 2/77                   | 0.53 (0.21 to 1.35)      | 0.25 (0.06 to 1.06)                                 | 0.67 (0.15 to 2.95)                                 |
| 6 months                                                          | 4/58                   | 0.98 (0.35 to 2.78)      | 3/52                   | 0.93 (0.19 to 4.42)      | 2/59                   | 0.71 (0.32 to 1.58)      | 0.95 (0.16 to 5.72)                                 | 1.31 (0.24 to 7.14)                                 |
| <b>Patient Health Questionnaire-2, ≥3</b>                         |                        |                          |                        |                          |                        |                          |                                                     |                                                     |
| Baseline, all groups                                              | 82/294                 | 1.00 (reference)         |                        |                          |                        |                          |                                                     |                                                     |
| 3 months                                                          | 20/84                  | 0.86 (0.52 to 1.42)      | 15/75                  | 0.71 (0.39 to 1.30)      | 18/77                  | 0.91 (0.56 to 1.48)      | 0.82 (0.39 to 1.76)                                 | 0.78 (0.37 to 1.66)                                 |
| 6 months                                                          | 15/57                  | 0.94 (0.56 to 1.59)      | 9/52                   | 0.81 (0.38 to 1.72)      | 11/59                  | 0.71 (0.43 to 1.19)      | 0.85 (0.35 to 2.08)                                 | 1.13 (0.46 to 2.76)                                 |
| <b>Saltin-Grimbv Physical Activity Level, moderate/vigorous</b>   |                        |                          |                        |                          |                        |                          |                                                     |                                                     |
| Baseline, all groups                                              | 84/294                 | 1.00 (reference)         |                        |                          |                        |                          |                                                     |                                                     |
| 3 months                                                          | 22/84                  | 0.81 (0.49 to 1.32)      | 22/75                  | 0.98 (0.63 to 1.53)      | 23/77                  | 1.28 (0.77 to 2.13)      | 1.21 (0.64 to 2.31)                                 | 0.77 (0.41 to 1.45)                                 |
| 6 months                                                          | 20/59                  | 1.29 (0.75 to 2.21)      | 13/52                  | 0.76 (0.45 to 1.30)      | 22/60                  | 1.64 (0.96 to 2.80)      | 0.59 (0.28 to 1.23)                                 | 0.47 (0.22 to 0.97)                                 |
| <b>Sleep problems, insomnia</b>                                   |                        |                          |                        |                          |                        |                          |                                                     |                                                     |
| Baseline, all groups                                              | 140/294                | 1.00 (reference)         |                        |                          |                        |                          |                                                     |                                                     |
| 3 months                                                          | 32/84                  | 0.71 (0.48 to 1.06)      | 25/75                  | 0.56 (0.35 to 0.90)      | 23/77                  | 0.51 (0.33 to 0.78)      | 0.79 (0.44 to 1.43)                                 | 1.11 (0.60 to 2.07)                                 |
| 6 months                                                          | 22/59                  | 0.64 (0.41 to 0.99)      | 13/52                  | 0.41 (0.25 to 0.70)      | 16/60                  | 0.54 (0.32 to 0.92)      | 0.65 (0.33 to 1.27)                                 | 0.76 (0.37 to 1.57)                                 |
| <b>Work ability, high (&gt;7)</b>                                 |                        |                          |                        |                          |                        |                          |                                                     |                                                     |
| Baseline, all groups                                              | 42/294                 | 1.00 (reference)         |                        |                          |                        |                          |                                                     |                                                     |
| 3 months                                                          | 11/84                  | 0.96 (0.51 to 1.80)      | 16/75                  | 1.50 (0.82 to 2.75)      | 17/77                  | 1.90 (1.01 to 3.56)      | 1.56 (0.70 to 3.46)                                 | 0.79 (0.35 to 1.76)                                 |
| 6 months                                                          | 13/59                  | 2.30 (1.19 to 4.44)      | 12/52                  | 1.47 (0.72 to 3.01)      | 15/60                  | 2.27 (1.11 to 4.63)      | 0.64 (0.26 to 1.59)                                 | 0.65 (0.25 to 1.66)                                 |
| <b>Patient Acceptable Symptom State, acceptable</b>               |                        |                          |                        |                          |                        |                          |                                                     |                                                     |
| Baseline, all groups                                              | N/A                    |                          |                        |                          |                        |                          |                                                     |                                                     |
| 3 months                                                          | 23/84                  | 1.05 (0.64 to 1.73)      | 31/75                  | 1.86 (0.94 to 3.68)      | 31/75                  | 2.13 (1.07 to 4.25)      | 1.76 (0.90 to 3.44)                                 | 0.87 (0.44 to 1.71)                                 |
| 6 months                                                          | 21/57                  | 1.89 (0.97 to 3.71)      | 24/52                  | 2.25 (1.07 to 4.71)      | 22/59                  | 1.76 (0.86 to 3.62)      | 1.19 (0.54 to 2.61)                                 | 1.28 (0.60 to 2.72)                                 |

Abbreviations: CI, Confidence Interval; OR, odds ratio; N/A, Not Applicable

<sup>a</sup> Adjusted for age (years), sex (male, female), education (<10, 10-12, >12 years), average pain intensity past week at baseline (continuous, range 0-10)

<sup>b</sup> App-delivered self-management support in addition to usual care

<sup>c</sup> Web-based self-management support in addition to usual care
