# Supplementary material for: Effect of an Artificial Intelligence–Based Self-Management App on Musculoskeletal Health in Patients With Neck and/or Low Back Pain Referred to Specialist Care: A Randomized Clinical Trial
Source: PubMed Central journal article supplement (PMC10300712; doi:10.1001/jamanetworkopen.2023.20400), 2023-06-27
Supplement: jamanetwopen-e2320400-s003.pdf [file jamanetwopen-e2320400-s003.pdf]

## Data Sharing Statement

Marcuzzi. Effect of an Artificial Intelligence–Based Self-Management App on Musculoskeletal Health in Patients With Neck and/or Low Back Pain Referred to Specialist Care. *JAMA Netw Open*. Published June 27, 2023. doi:10.1001/jamanetworkopen.2023.20400

### Data

**Data available:** Yes

**Data types:** Other (please specify)

**Additional Information:** Data is kept for 5 years (reidentifiable data) and thereafter the data will be anonymised and stored up to 30 years.

**How to access data:** Contact to Paul Jarle Mork ([paul.mork@ntnu.no](mailto:paul.mork@ntnu.no))

**When available:** With publication

### Supporting Documents

**Document types:** None

### Additional Information

**Who can access the data:** Researchers whose proposed use of the data has been approved by the data steering group

**Types of analyses:** Any relevant research purpose

**Mechanisms of data availability:** After approval by the data steering group. Contact to Paul Jarle Mork ([paul.mork@ntnu.no](mailto:paul.mork@ntnu.no))
